# Supplementary material for: Airborne Microplastic in the Atmospheric Deposition and How to Identify and Quantify the Threat: Semi-Quantitative Approach Based on Kraków Case Study
Source: MDPI journal article supplement (doi:10.3390/ijerph191912252), 2022-09-27

**BK 1**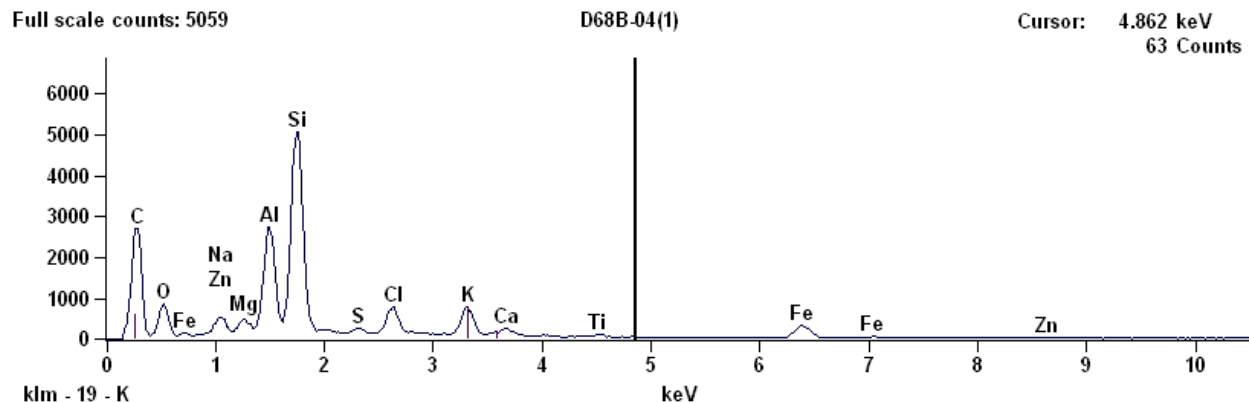

Live Time: 100.0 sec.

Fri Jan 10 14:10:34 2020

Filter Fit Chi Squared: 3.711

Errors: +/- 1 Sigma

Correction Method: Proza (Phi-Rho-Z)

Acc.Voltage: 20.0 kV Take Off Angle: 28.5 deg.

Quantitative Results for: D68B-04(1)

| Element Line | Net Counts | Net Counts Error | Weight % | Weight % Error | Atom % | Atom % Error | Formula | Compnd % | # Cations |
|--------------|------------|------------------|----------|----------------|--------|--------------|---------|----------|-----------|
| O K          | 6572       | +/- 129          | 35.35    | +/- 0.69       | 50.99  | +/- 1.00     | O       | 35.35    | ---       |
| Na K         | 2620       | +/- 133          | 2.90     | +/- 0.15       | 2.91   | +/- 0.15     | Na      | 2.90     | 1.369     |
| Mg K         | 1854       | +/- 157          | 1.30     | +/- 0.11       | 1.23   | +/- 0.10     | Mg      | 1.30     | 0.580     |
| Al K         | 25455      | +/- 284          | 12.91    | +/- 0.14       | 11.04  | +/- 0.12     | Al      | 12.91    | 5.198     |
| Si K         | 55609      | +/- 387          | 28.59    | +/- 0.20       | 23.49  | +/- 0.16     | Si      | 28.59    | 11.057    |
| S K          | 1349       | +/- 89           | 0.77     | +/- 0.05       | 0.55   | +/- 0.04     | S       | 0.77     | 0.261     |
| Cl K         | 8324       | +/- 195          | 4.89     | +/- 0.11       | 3.18   | +/- 0.07     | Cl      | 4.89     | 1.498     |
| K K          | 8805       | +/- 207          | 5.06     | +/- 0.12       | 2.99   | +/- 0.07     | K       | 5.06     | 1.405     |
| Ca K         | 2101       | +/- 163          | 1.27     | +/- 0.10       | 0.73   | +/- 0.06     | Ca      | 1.27     | 0.344     |
| Ti K         | 399        | +/- 58           | 0.31     | +/- 0.05       | 0.15   | +/- 0.02     | Ti      | 0.31     | 0.071     |
| Fe K         | 5175       | +/- 115          | 6.25     | +/- 0.14       | 2.58   | +/- 0.06     | Fe      | 6.25     | 1.215     |
| Zn K         | 173        | +/- 58           | 0.42     | +/- 0.14       | 0.15   | +/- 0.05     | Zn      | 0.42     | 0.070     |
| Total        |            |                  | 100.00   |                | 100.00 |              |         | 100.00   | 23.068    |

## BK 2

Full scale counts: 1692

D68B-04(2)

Cursor: 9.058 keV  
13 Counts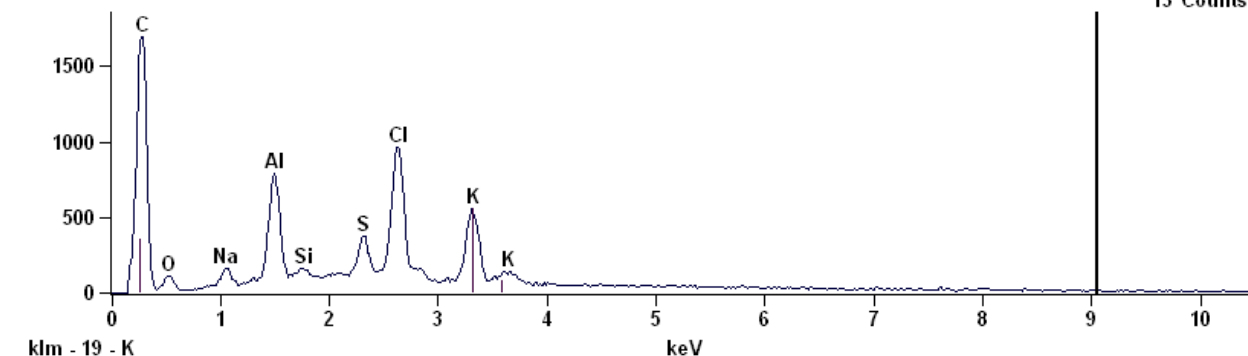

Live Time: 100.0 sec.

Fri Jan 10 14:13:24 2020

Filter Fit Chi Squared: 7.640

Errors: +/- 1 Sigma

Correction Method: Proza (Phi-Rho-Z)

Acc.Voltage: 20.0 kV Take Off Angle: 28.5 deg.

Quantitative Results for: D68B-04(2)

| Element Line | Net Counts | Net Counts Error | Weight % | Weight % Error | Atom % | Atom % Error | Formula | Compnd % | # Cations |
|--------------|------------|------------------|----------|----------------|--------|--------------|---------|----------|-----------|
| O K          | 708        | +/- 47           | 28.25    | +/- 1.88       | 44.41  | +/- 2.95     | O       | 28.25    | ---       |
| Na K         | 942        | +/- 59           | 4.50     | +/- 0.28       | 4.93   | +/- 0.31     | Na      | 4.50     | 2.663     |
| Al K         | 7221       | +/- 119          | 16.07    | +/- 0.26       | 14.98  | +/- 0.25     | Al      | 16.07    | 8.095     |
| Si K         | 416        | +/- 59           | 0.98     | +/- 0.14       | 0.88   | +/- 0.12     | Si      | 0.98     | 0.475     |
| S K          | 2900       | +/- 90           | 5.68     | +/- 0.18       | 4.46   | +/- 0.14     | S       | 5.68     | 2.409     |
| Cl K         | 11358      | +/- 204          | 25.95    | +/- 0.47       | 18.41  | +/- 0.33     | Cl      | 25.95    | 9.950     |
| K K          | 6769       | +/- 164          | 18.56    | +/- 0.45       | 11.94  | +/- 0.29     | K       | 18.56    | 6.451     |
| Total        |            |                  | 100.00   |                | 100.00 |              |         | 100.00   | 30.043    |

## BK 3

Full scale counts: 3061

D68B-05(1)

Cursor: 7.961 keV  
20 Counts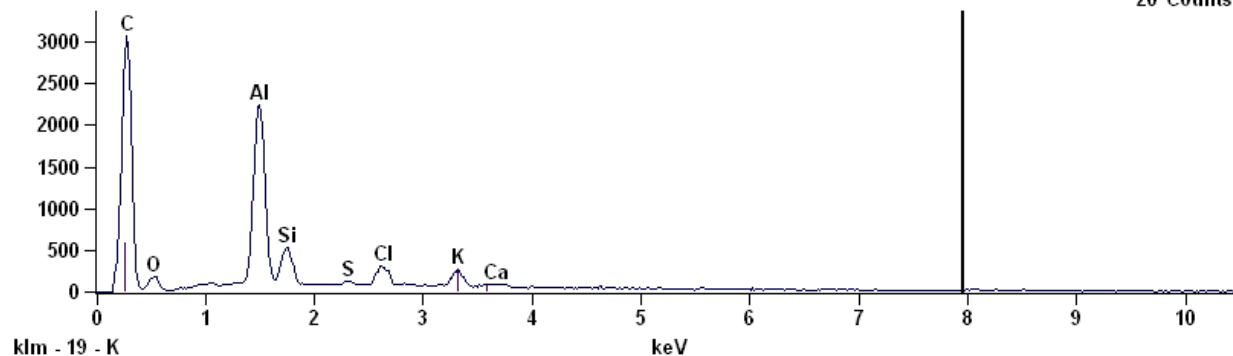

Live Time: 100.0 sec.

Fri Jan 10 14:19:17 2020

Filter Fit Chi Squared: 7.245

Errors: +/- 1 Sigma

Correction Method: Proza (Phi-Rho-Z)

Acc.Voltage: 20.0 kV Take Off Angle: 28.4 deg.

Quantitative Results for: D68B-05(1)

| Element Line | Net Counts | Net Counts Error | Weight % | Weight % Error | Atom % | Atom % Error | Formula | Compnd % | # Cations |
|--------------|------------|------------------|----------|----------------|--------|--------------|---------|----------|-----------|
| O K          | 1256       | +/- 59           | 31.19    | +/- 1.46       | 45.21  | +/- 2.12     | O       | 31.19    | ---       |
| Al K         | 22746      | +/- 211          | 38.77    | +/- 0.36       | 33.33  | +/- 0.31     | Al      | 38.77    | 17.693    |
| Si K         | 4827       | +/- 146          | 12.94    | +/- 0.39       | 10.69  | +/- 0.32     | Si      | 12.94    | 5.673     |
| S K          | 605        | +/- 63           | 1.40     | +/- 0.15       | 1.01   | +/- 0.11     | S       | 1.40     | 0.537     |
| Cl K         | 3234       | +/- 134          | 7.75     | +/- 0.32       | 5.07   | +/- 0.21     | Cl      | 7.75     | 2.692     |
| K K          | 2602       | +/- 133          | 6.22     | +/- 0.32       | 3.69   | +/- 0.19     | K       | 6.22     | 1.957     |
| Ca K         | 691        | +/- 114          | 1.74     | +/- 0.29       | 1.01   | +/- 0.17     | Ca      | 1.74     | 0.534     |
| Total        |            |                  | 100.00   |                | 100.00 |              |         | 100.00   | 29.086    |

**BK 4**

Full scale counts: 2635

D68B-05(2)

Cursor: 5.907 keV  
34 Counts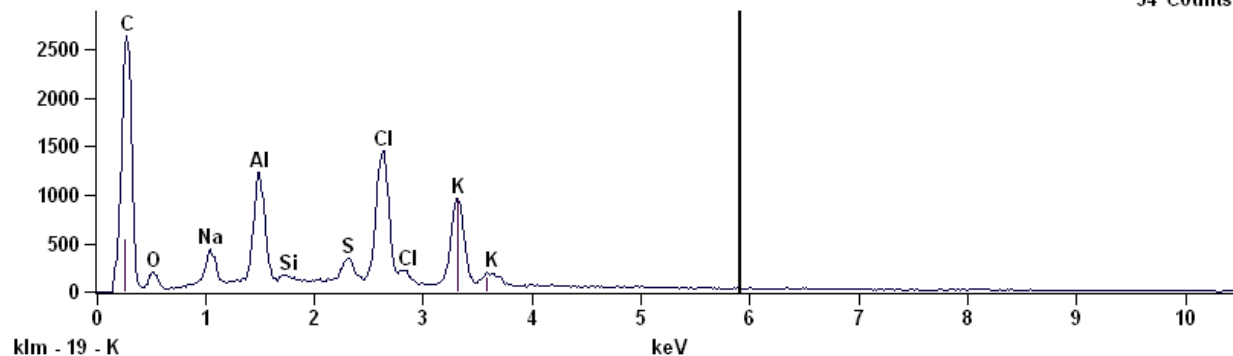

Live Time: 100.0 sec.

Fri Jan 10 14:21:49 2020

Filter Fit Chi Squared:9.692

Errors: +/- 1 Sigma

Correction Method: Proza (Phi-Rho-Z)

Acc.Voltage: 20.0 kV Take Off Angle: 28.4 deg.

Quantitative Results for: D68B-05(2)

| Element Line | Net Counts | Net Counts Error | Weight % | Weight % Error | Atom % | Atom % Error | Formula | Compnd % | # Cations |
|--------------|------------|------------------|----------|----------------|--------|--------------|---------|----------|-----------|
| O K          | 1195       | +/- 61           | 27.74    | +/- 1.42       | 43.27  | +/- 2.21     | O       | 27.74    | ---       |
| Na K         | 3059       | +/- 87           | 8.57     | +/- 0.24       | 9.31   | +/- 0.26     | Na      | 8.57     | 5.162     |
| Al K         | 11453      | +/- 147          | 16.03    | +/- 0.21       | 14.83  | +/- 0.19     | Al      | 16.03    | 8.225     |
| Si K         | 384        | +/- 64           | 0.56     | +/- 0.09       | 0.50   | +/- 0.08     | Si      | 0.56     | 0.277     |
| S K          | 2741       | +/- 166          | 3.25     | +/- 0.20       | 2.53   | +/- 0.15     | S       | 3.25     | 1.404     |
| Cl K         | 17907      | +/- 241          | 24.01    | +/- 0.32       | 16.90  | +/- 0.23     | Cl      | 24.01    | 9.375     |
| K K          | 12380      | +/- 202          | 19.83    | +/- 0.32       | 12.66  | +/- 0.21     | K       | 19.83    | 7.021     |
| Total        |            |                  | 100.00   |                | 100.00 |              |         | 100.00   | 31.464    |

## BK 5

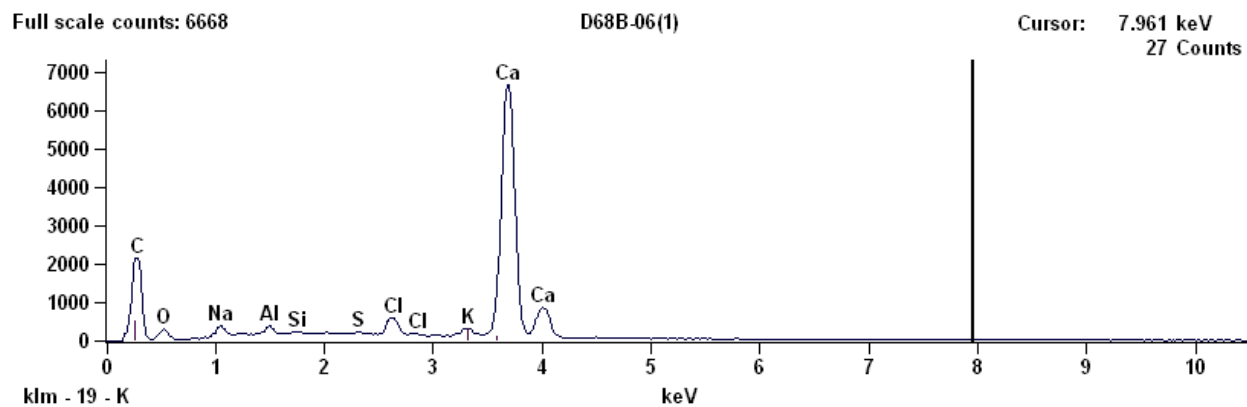

Live Time: 100.0 sec.

Fri Jan 10 14:33:33 2020

Filter Fit Chi Squared:6.106

Errors: +/- 1 Sigma

Correction Method: Proza (Phi-Rho-Z)

Acc.Voltage: 20.0 kV Take Off Angle: 28.7 deg.

Quantitative Results for: D68B-06(1)

| Element Line | Net Counts | Net Counts Error | Weight % | Weight % Error | Atom % | Atom % Error | Formula | Compnd % | # Cations |
|--------------|------------|------------------|----------|----------------|--------|--------------|---------|----------|-----------|
| O K          | 2218       | +/- 72           | 32.31    | +/- 1.05       | 52.84  | +/- 1.72     | O       | 32.31    | ---       |
| Na K         | 2576       | +/- 88           | 4.26     | +/- 0.15       | 4.85   | +/- 0.17     | Na      | 4.26     | 2.202     |
| Al K         | 1876       | +/- 111          | 1.28     | +/- 0.08       | 1.24   | +/- 0.07     | Al      | 1.28     | 0.564     |
| Si K         | 718        | +/- 74           | 0.39     | +/- 0.04       | 0.37   | +/- 0.04     | Si      | 0.39     | 0.166     |
| S K          | 1154       | +/- 163          | 0.53     | +/- 0.08       | 0.44   | +/- 0.06     | S       | 0.53     | 0.198     |
| Cl K         | 6162       | +/- 186          | 3.11     | +/- 0.09       | 2.30   | +/- 0.07     | Cl      | 3.11     | 1.043     |
| K K          | 2640       | +/- 93           | 1.34     | +/- 0.05       | 0.90   | +/- 0.03     | K       | 1.34     | 0.408     |
| Ca K         | 94347      | +/- 560          | 56.78    | +/- 0.34       | 37.07  | +/- 0.22     | Ca      | 56.78    | 16.838    |
| Total        |            |                  | 100.00   |                | 100.00 |              |         | 100.00   | 21.419    |

## BK 6

Full scale counts: 10942

D68B-06(2)

Cursor: 7.249 keV  
21 Counts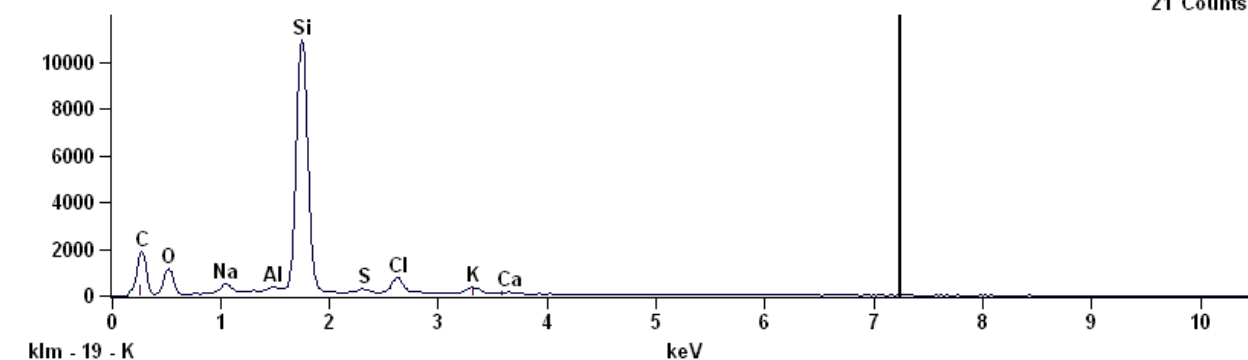

Live Time: 100.0 sec.

Fri Jan 10 14:36:10 2020

Filter Fit Chi Squared:6.462

Errors: +/- 1 Sigma

Correction Method: Proza (Phi-Rho-Z)

Acc.Voltage: 20.0 kV Take Off Angle: 28.7 deg.

Quantitative Results for: D68B-06(2)

| Element Line | Net Counts | Net Counts Error | Weight % | Weight % Error | Atom % | Atom % Error | Formula | Compnd % | # Cations |
|--------------|------------|------------------|----------|----------------|--------|--------------|---------|----------|-----------|
| O K          | 9518       | +/- 127          | 43.27    | +/- 0.58       | 57.69  | +/- 0.77     | O       | 43.27    | ---       |
| Na K         | 3967       | +/- 103          | 3.62     | +/- 0.09       | 3.36   | +/- 0.09     | Na      | 3.62     | 1.398     |
| Al K         | 1163       | +/- 92           | 0.49     | +/- 0.04       | 0.39   | +/- 0.03     | Al      | 0.49     | 0.162     |
| Si K         | 121358     | +/- 553          | 44.27    | +/- 0.20       | 33.63  | +/- 0.15     | Si      | 44.27    | 13.989    |
| S K          | 1860       | +/- 155          | 1.00     | +/- 0.08       | 0.67   | +/- 0.06     | S       | 1.00     | 0.277     |
| Cl K         | 8532       | +/- 193          | 4.72     | +/- 0.11       | 2.84   | +/- 0.06     | Cl      | 4.72     | 1.183     |
| K K          | 4105       | +/- 167          | 2.21     | +/- 0.09       | 1.20   | +/- 0.05     | K       | 2.21     | 0.501     |
| Ca K         | 740        | +/- 140          | 0.41     | +/- 0.08       | 0.22   | +/- 0.04     | Ca      | 0.41     | 0.091     |
| <b>Total</b> |            |                  | 100.00   |                | 100.00 |              |         | 100.00   | 17.601    |

## BK 7

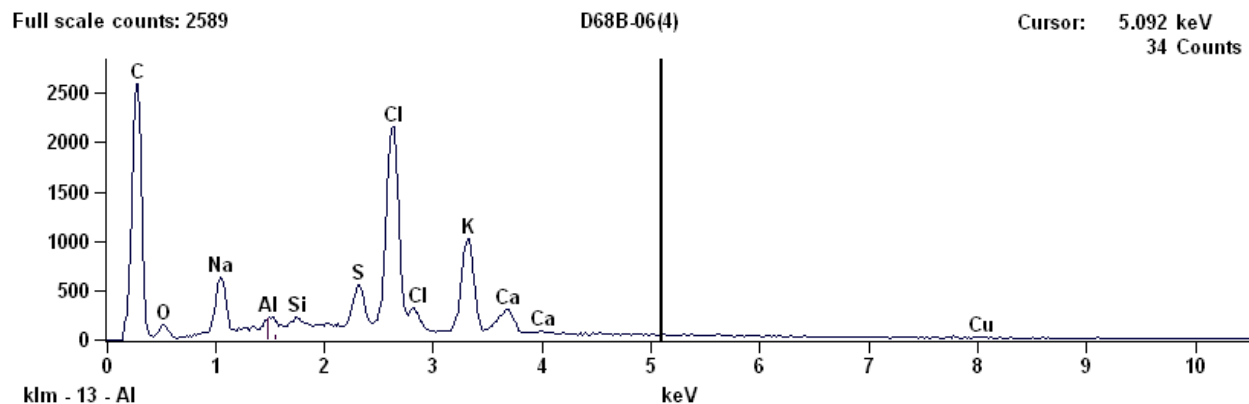

Live Time: 100.0 sec.

Fri Jan 10 14:40:04 2020

Filter Fit Chi Squared:3.393

Errors: +/- 1 Sigma

Correction Method: Proza (Phi-Rho-Z)

Acc.Voltage: 20.0 kV Take Off Angle: 28.7 deg.

Quantitative Results for: D68B-06(4)

| Element Line | Net Counts | Net Counts Error | Weight % | Weight % Error | Atom % | Atom % Error | Formula | Compnd % | # Cations |
|--------------|------------|------------------|----------|----------------|--------|--------------|---------|----------|-----------|
| O K          | 898        | +/- 54           | 22.11    | +/- 1.33       | 36.76  | +/- 2.21     | O       | 22.11    | ---       |
| Na K         | 5401       | +/- 104          | 14.45    | +/- 0.28       | 16.72  | +/- 0.32     | Na      | 14.45    | 10.916    |
| Al K         | 833        | +/- 59           | 1.20     | +/- 0.08       | 1.18   | +/- 0.08     | Al      | 1.20     | 0.770     |
| Si K         | 944        | +/- 112          | 1.09     | +/- 0.13       | 1.04   | +/- 0.12     | Si      | 1.09     | 0.676     |
| S K          | 5493       | +/- 193          | 5.51     | +/- 0.19       | 4.57   | +/- 0.16     | S       | 5.51     | 2.982     |
| Cl K         | 26348      | +/- 288          | 31.44    | +/- 0.34       | 23.59  | +/- 0.26     | Cl      | 31.44    | 15.400    |
| K K          | 12283      | +/- 211          | 18.54    | +/- 0.32       | 12.61  | +/- 0.22     | K       | 18.54    | 8.232     |
| Ca K         | 2821       | +/- 84           | 4.80     | +/- 0.14       | 3.18   | +/- 0.09     | Ca      | 4.80     | 2.078     |
| Cu K         | 171        | +/- 50           | 0.87     | +/- 0.25       | 0.36   | +/- 0.11     | Cu      | 0.87     | 0.237     |
| Total        |            |                  | 100.00   |                | 100.00 |              |         | 100.00   | 41.290    |

## BK 8

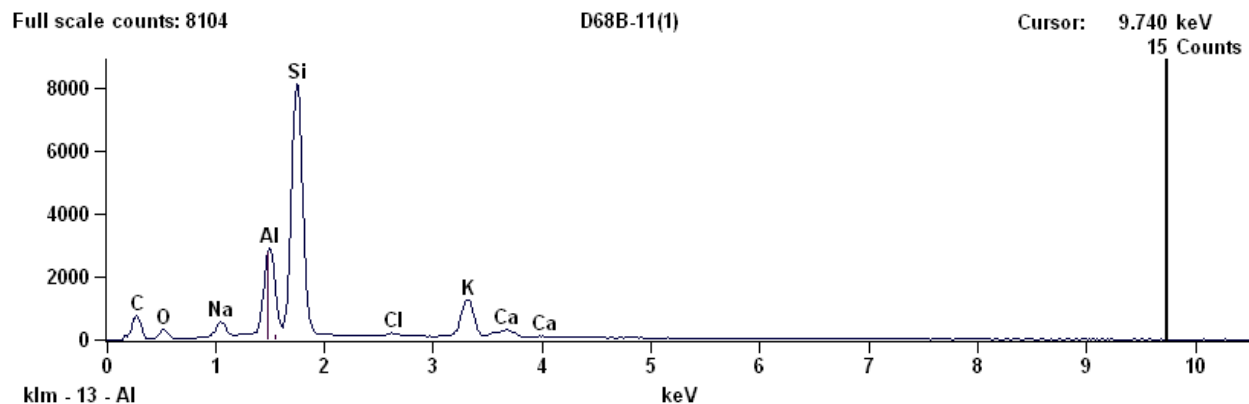

Live Time: 100.0 sec.

Fri Jan 10 14:57:00 2020

Filter Fit Chi Squared:4.049

Errors: +/- 1 Sigma

Correction Method: Proza (Phi-Rho-Z)

Acc.Voltage: 20.0 kV Take Off Angle: 30.4 deg.

Quantitative Results for: D68B-11(1)

| Element Line | Net Counts | Net Counts Error | Weight % | Weight % Error | Atom % | Atom % Error | Formula | Compnd % | # Cations |
|--------------|------------|------------------|----------|----------------|--------|--------------|---------|----------|-----------|
| O K          | 2475       | +/- 69           | 20.29    | +/- 0.57       | 31.57  | +/- 0.88     | O       | 20.29    | ---       |
| Na K         | 4513       | +/- 97           | 4.27     | +/- 0.09       | 4.62   | +/- 0.10     | Na      | 4.27     | 3.514     |
| Al K         | 27790      | +/- 274          | 13.79    | +/- 0.14       | 12.72  | +/- 0.13     | Al      | 13.79    | 9.667     |
| Si K         | 87334      | +/- 480          | 47.35    | +/- 0.26       | 41.97  | +/- 0.23     | Si      | 47.35    | 31.902    |
| Cl K         | 1088       | +/- 131          | 0.82     | +/- 0.10       | 0.57   | +/- 0.07     | Cl      | 0.82     | 0.435     |
| K K          | 15736      | +/- 249          | 11.05    | +/- 0.17       | 7.03   | +/- 0.11     | K       | 11.05    | 5.347     |
| Ca K         | 3196       | +/- 184          | 2.43     | +/- 0.14       | 1.51   | +/- 0.09     | Ca      | 2.43     | 1.148     |
| Total        |            |                  | 100.00   |                | 100.00 |              |         | 100.00   | 52.014    |



## BK 9

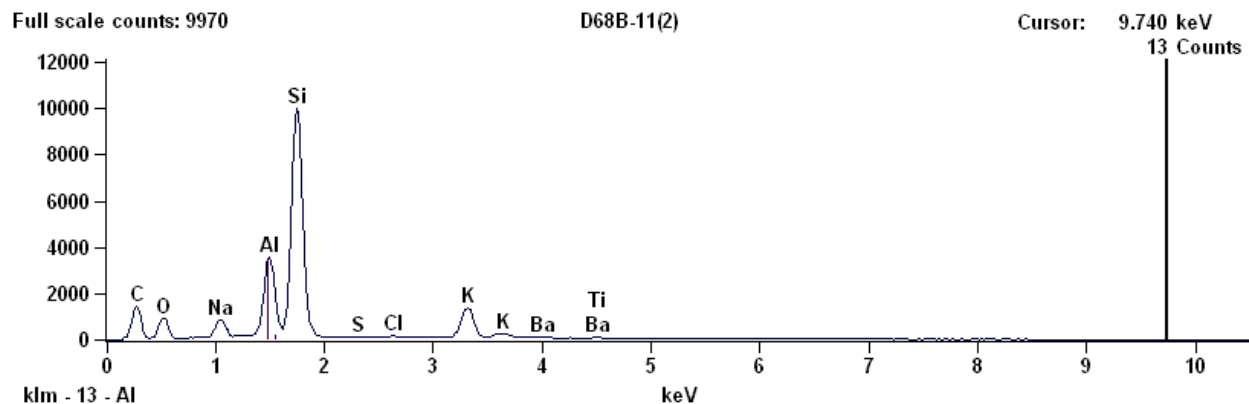

Live Time: 100.0 sec.

Fri Jan 10 14:59:40 2020

Filter Fit Chi Squared: 8.519

Errors: +/- 1 Sigma

Correction Method: Proza (Phi-Rho-Z)

Acc.Voltage: 20.0 kV Take Off Angle: 30.4 deg.

Quantitative Results for: D68B-11(2)

| Element Line | Net Counts | Net Counts Error | Weight % | Weight % Error | Atom % | Atom % Error | Formula | Compnd % | # Cations |
|--------------|------------|------------------|----------|----------------|--------|--------------|---------|----------|-----------|
| O K          | 7832       | +/- 115          | 33.79    | +/- 0.50       | 47.66  | +/- 0.70     | O       | 33.79    | ---       |
| Na K         | 7237       | +/- 121          | 5.13     | +/- 0.09       | 5.04   | +/- 0.08     | Na      | 5.13     | 2.536     |
| Al K         | 33453      | +/- 307          | 12.02    | +/- 0.11       | 10.05  | +/- 0.09     | Al      | 12.02    | 5.064     |
| Si K         | 106382     | +/- 548          | 39.83    | +/- 0.21       | 32.00  | +/- 0.16     | Si      | 39.83    | 16.117    |
| S K          | 512        | +/- 74           | 0.25     | +/- 0.04       | 0.17   | +/- 0.03     | S       | 0.25     | 0.087     |
| Cl K         | 636        | +/- 71           | 0.31     | +/- 0.03       | 0.20   | +/- 0.02     | Cl      | 0.31     | 0.100     |
| K K          | 17826      | +/- 243          | 8.26     | +/- 0.11       | 4.77   | +/- 0.06     | K       | 8.26     | 2.400     |
| Ti K         | 211        | +/- 68           | 0.14     | +/- 0.04       | 0.06   | +/- 0.02     | Ti      | 0.14     | 0.032     |
| Ba L         | 287        | +/- 114          | 0.28     | +/- 0.11       | 0.05   | +/- 0.02     | Ba      | 0.28     | 0.023     |
| Total        |            |                  | 100.00   |                | 100.00 |              |         | 100.00   | 26.358    |

## BK 10

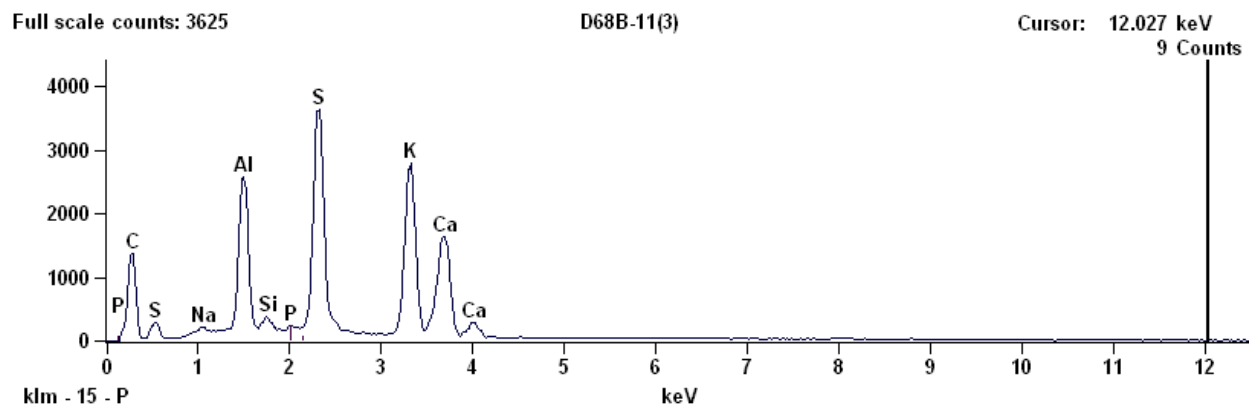

Live Time: 100.0 sec.

Fri Jan 10 15:02:29 2020

Filter Fit Chi Squared:34.329

Errors: +/- 1 Sigma

Correction Method: Proza (Phi-Rho-Z)

Acc.Voltage: 20.0 kV Take Off Angle: 30.4 deg.

## Quantitative Results for: D68B-11(3)

| Element Line | Net Counts | Net Counts Error | Weight % | Weight % Error | Atom % | Atom % Error | Formula | Compnd % | # Cations |
|--------------|------------|------------------|----------|----------------|--------|--------------|---------|----------|-----------|
| Na K         | 873        | +/- 81           | 1.24     | +/- 0.11       | 1.83   | +/- 0.17     | Na      | 1.24     | ---       |
| Al K         | 25208      | +/- 227          | 16.39    | +/- 0.15       | 20.69  | +/- 0.19     | Al      | 16.39    | ---       |
| Si K         | 1919       | +/- 155          | 1.34     | +/- 0.11       | 1.63   | +/- 0.13     | Si      | 1.34     | ---       |
| P K          | 345        | +/- 91           | 0.24     | +/- 0.06       | 0.26   | +/- 0.07     | P       | 0.24     | ---       |
| S K          | 48030      | +/- 358          | 29.51    | +/- 0.22       | 31.36  | +/- 0.23     | S       | 29.51    | ---       |
| K K          | 35629      | +/- 359          | 29.20    | +/- 0.29       | 25.45  | +/- 0.26     | K       | 29.20    | ---       |
| Ca K         | 22145      | +/- 311          | 22.08    | +/- 0.31       | 18.77  | +/- 0.26     | Ca      | 22.08    | ---       |
| Total        |            |                  | 100.00   |                | 100.00 |              |         | 100.00   | 0.000     |

**BK 11**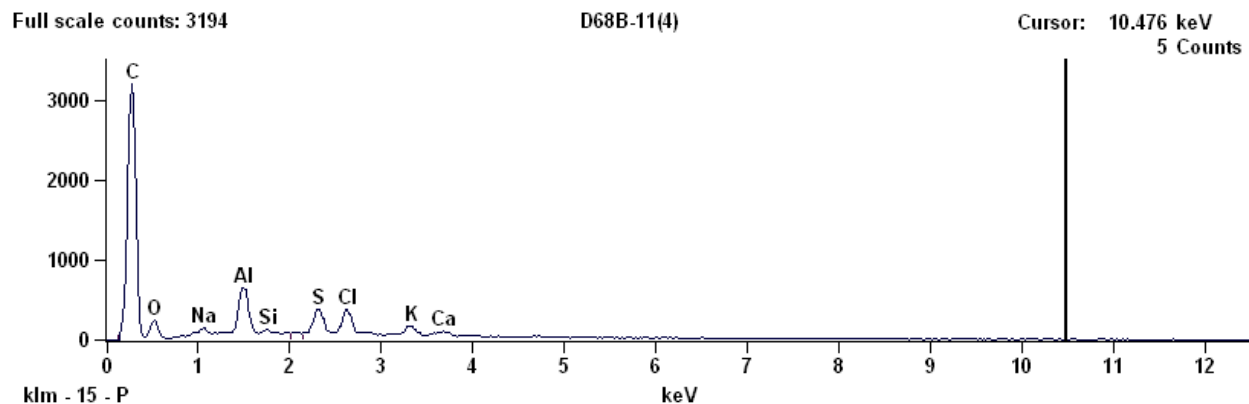

Live Time: 100.0 sec.

Fri Jan 10 15:05:06 2020

Filter Fit Chi Squared: 5.325

Errors: +/- 1 Sigma

Correction Method: Proza (Phi-Rho-Z)

Acc.Voltage: 20.0 kV Take Off Angle: 30.4 deg.

Quantitative Results for: D68B-11(4)

| Element Line | Net Counts | Net Counts Error | Weight % | Weight % Error | Atom % | Atom % Error | Formula | Compnd % | # Cations |
|--------------|------------|------------------|----------|----------------|--------|--------------|---------|----------|-----------|
| O K          | 1644       | +/- 62           | 47.76    | +/- 1.80       | 63.50  | +/- 2.39     | O       | 47.76    | ---       |
| Na K         | 804        | +/- 61           | 4.76     | +/- 0.36       | 4.41   | +/- 0.33     | Na      | 4.76     | 1.665     |
| Al K         | 6123       | +/- 121          | 16.83    | +/- 0.33       | 13.27  | +/- 0.26     | Al      | 16.83    | 5.016     |
| Si K         | 514        | +/- 97           | 1.50     | +/- 0.28       | 1.14   | +/- 0.21     | Si      | 1.50     | 0.429     |
| S K          | 4176       | +/- 144          | 10.26    | +/- 0.35       | 6.81   | +/- 0.23     | S       | 10.26    | 2.572     |
| Cl K         | 3802       | +/- 143          | 11.23    | +/- 0.42       | 6.74   | +/- 0.25     | Cl      | 11.23    | 2.546     |
| K K          | 1726       | +/- 115          | 5.41     | +/- 0.36       | 2.95   | +/- 0.20     | K       | 5.41     | 1.113     |
| Ca K         | 677        | +/- 53           | 2.25     | +/- 0.18       | 1.19   | +/- 0.09     | Ca      | 2.25     | 0.451     |
| Total        |            |                  | 100.00   |                | 100.00 |              |         | 100.00   | 13.793    |

## BK 12

Full scale counts: 4108

D68B-13(1)

Cursor: 6.969 keV  
26 Counts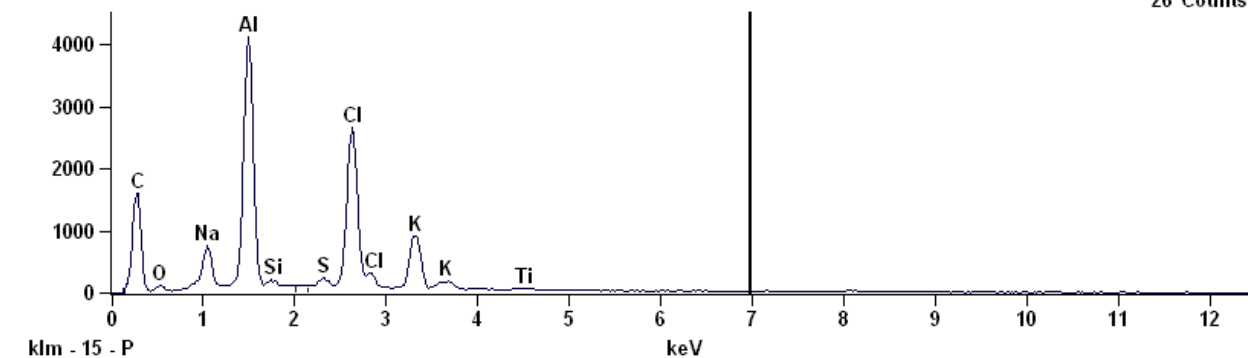

Live Time: 100.0 sec.

Fri Jan 10 15:13:13 2020

Filter Fit Chi Squared:12.028

Errors: +/- 1 Sigma

Correction Method: Proza (Phi-Rho-Z)

Acc.Voltage: 20.0 kV Take Off Angle: 30.4 deg.

Quantitative Results for: D68B-13(1)

| Element Line | Net Counts | Net Counts Error | Weight % | Weight % Error | Atom % | Atom % Error | Formula | Compnd % | # Cations |
|--------------|------------|------------------|----------|----------------|--------|--------------|---------|----------|-----------|
| O K          | 593        | +/- 53           | 9.48     | +/- 0.85       | 16.70  | +/- 1.49     | O       | 9.48     | ---       |
| Na K         | 6017       | +/- 111          | 8.64     | +/- 0.16       | 10.60  | +/- 0.20     | Na      | 8.64     | 15.224    |
| Al K         | 41754      | +/- 270          | 33.97    | +/- 0.22       | 35.51  | +/- 0.23     | Al      | 33.97    | 51.018    |
| Si K         | 632        | +/- 71           | 0.71     | +/- 0.08       | 0.72   | +/- 0.08     | Si      | 0.71     | 1.029     |
| S K          | 1298       | +/- 83           | 1.14     | +/- 0.07       | 1.00   | +/- 0.06     | S       | 1.14     | 1.436     |
| Cl K         | 32760      | +/- 299          | 31.17    | +/- 0.28       | 24.79  | +/- 0.23     | Cl      | 31.17    | 35.620    |
| K K          | 12627      | +/- 198          | 14.46    | +/- 0.23       | 10.43  | +/- 0.16     | K       | 14.46    | 14.983    |
| Ti K         | 288        | +/- 49           | 0.44     | +/- 0.08       | 0.26   | +/- 0.04     | Ti      | 0.44     | 0.373     |
| Total        |            |                  | 100.00   |                | 100.00 |              |         | 100.00   | 119.683   |

**BK 13**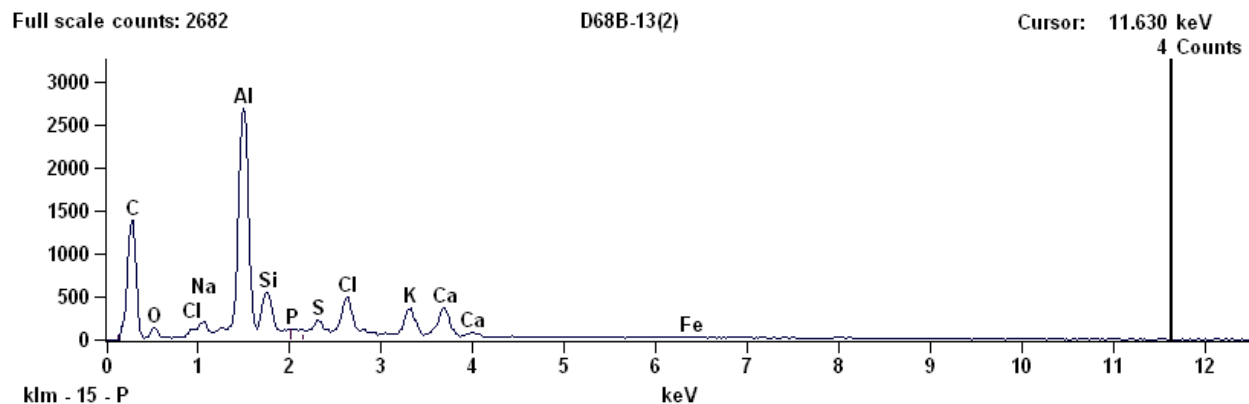

Live Time: 100.0 sec.

Fri Jan 10 15:15:49 2020

Filter Fit Chi Squared: 4.299

Errors: +/- 1 Sigma

Correction Method: Proza (Phi-Rho-Z)

Acc.Voltage: 20.0 kV Take Off Angle: 30.4 deg.

Quantitative Results for: D68B-13(2)

| Element Line | Net Counts | Net Counts Error | Weight % | Weight % Error | Atom % | Atom % Error | Formula | Compnd % | # Cations |
|--------------|------------|------------------|----------|----------------|--------|--------------|---------|----------|-----------|
| O K          | 912        | +/- 57           | 20.94    | +/- 1.31       | 33.30  | +/- 2.08     | O       | 20.94    | ---       |
| Na K         | 949        | +/- 73           | 2.62     | +/- 0.20       | 2.90   | +/- 0.22     | Na      | 2.62     | 2.090     |
| Al K         | 27275      | +/- 230          | 37.07    | +/- 0.31       | 34.95  | +/- 0.29     | Al      | 37.07    | 25.192    |
| Si K         | 4982       | +/- 154          | 9.96     | +/- 0.31       | 9.02   | +/- 0.28     | Si      | 9.96     | 6.502     |
| P K          | 355        | +/- 65           | 0.73     | +/- 0.13       | 0.60   | +/- 0.11     | P       | 0.73     | 0.434     |
| S K          | 1404       | +/- 74           | 2.39     | +/- 0.13       | 1.90   | +/- 0.10     | S       | 2.39     | 1.370     |
| Cl K         | 5260       | +/- 154          | 9.50     | +/- 0.28       | 6.82   | +/- 0.20     | Cl      | 9.50     | 4.913     |
| K K          | 4077       | +/- 152          | 7.47     | +/- 0.28       | 4.86   | +/- 0.18     | K       | 7.47     | 3.501     |
| Ca K         | 3995       | +/- 153          | 7.82     | +/- 0.30       | 4.96   | +/- 0.19     | Ca      | 7.82     | 3.577     |
| Fe K         | 386        | +/- 52           | 1.50     | +/- 0.20       | 0.68   | +/- 0.09     | Fe      | 1.50     | 0.492     |
| <b>Total</b> |            |                  | 100.00   |                | 100.00 |              |         | 100.00   | 48.071    |

**BK 14**

Full scale counts: 5799

D68B-13(3)

Cursor: 11.630 keV  
5 Counts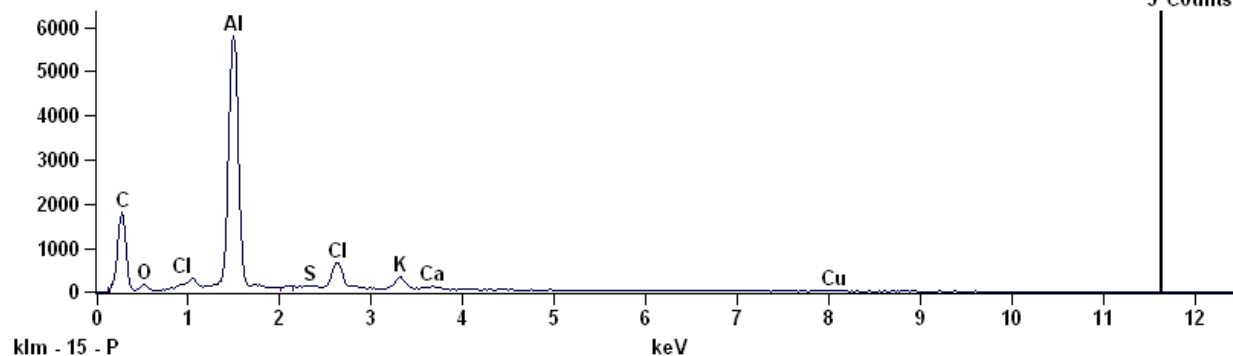

Live Time: 100.0 sec.

Fri Jan 10 15:18:16 2020

Filter Fit Chi Squared:11.609

Errors: +/- 1 Sigma

Correction Method: Proza (Phi-Rho-Z)

Acc.Voltage: 20.0 kV Take Off Angle: 30.4 deg.

Quantitative Results for: D68B-13(3)

| Element Line | Net Counts | Net Counts Error | Weight % | Weight % Error | Atom % | Atom % Error | Formula | Compnd % | # Cations |
|--------------|------------|------------------|----------|----------------|--------|--------------|---------|----------|-----------|
| O K          | 800        | +/- 55           | 14.08    | +/- 0.97       | 23.05  | +/- 1.58     | O       | 14.08    | ---       |
| Al K         | 60444      | +/- 336          | 63.14    | +/- 0.35       | 61.30  | +/- 0.34     | Al      | 63.14    | 63.832    |
| S K          | 431        | +/- 69           | 0.67     | +/- 0.11       | 0.55   | +/- 0.09     | S       | 0.67     | 0.574     |
| Cl K         | 8067       | +/- 170          | 12.99    | +/- 0.27       | 9.60   | +/- 0.20     | Cl      | 12.99    | 9.994     |
| K K          | 3496       | +/- 145          | 5.75     | +/- 0.24       | 3.85   | +/- 0.16     | K       | 5.75     | 4.014     |
| Ca K         | 639        | +/- 117          | 1.10     | +/- 0.20       | 0.72   | +/- 0.13     | Ca      | 1.10     | 0.746     |
| Cu K         | 415        | +/- 52           | 2.27     | +/- 0.28       | 0.93   | +/- 0.12     | Cu      | 2.27     | 0.973     |
| Total        |            |                  | 100.00   |                | 100.00 |              |         | 100.00   | 80.132    |

**BK 15**

Full scale counts: 5341

D68-02(1)

Cursor: 8.082 keV  
11 Counts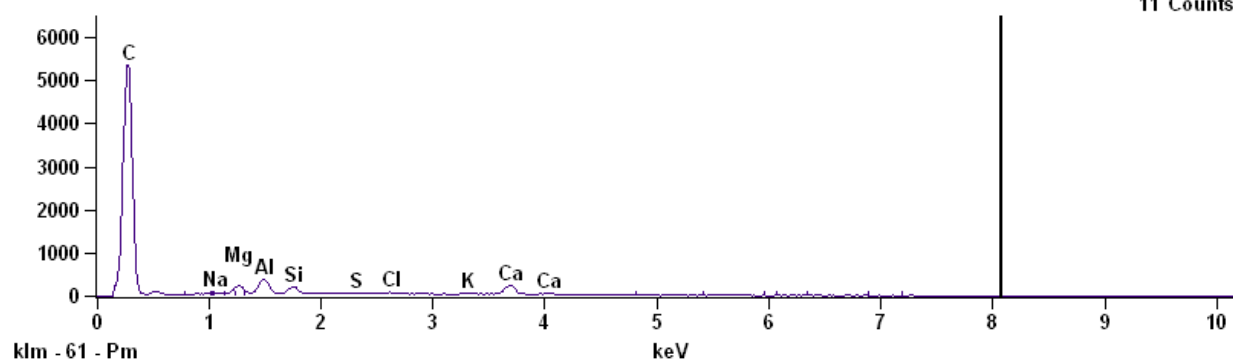

Live Time: 100.0 sec.

Fri Jan 24 12:37:36 2020

Filter Fit Chi Squared: 8.141

Errors: +/- 1 Sigma

Correction Method: Proza (Phi-Rho-Z)

Acc.Voltage: 20.0 kV Take Off Angle: 29.8 deg.

Quantitative Results for: D68-02(1)

| Element Line | Net Counts | Net Counts Error | Weight % | Weight % Error | Atom % | Atom % Error | Formula | Compnd % | # Cations |
|--------------|------------|------------------|----------|----------------|--------|--------------|---------|----------|-----------|
| Na K         | 403        | +/- 59           | 5.30     | +/- 0.78       | 6.91   | +/- 1.01     | Na      | 5.30     | ---       |
| Mg K         | 1412       | +/- 88           | 13.38    | +/- 0.83       | 16.51  | +/- 1.03     | Mg      | 13.38    | ---       |
| Al K         | 3005       | +/- 113          | 27.33    | +/- 1.03       | 30.36  | +/- 1.14     | Al      | 27.33    | ---       |
| Si K         | 1355       | +/- 97           | 14.60    | +/- 1.04       | 15.58  | +/- 1.12     | Si      | 14.60    | ---       |
| S K          | 336        | +/- 49           | 3.18     | +/- 0.46       | 2.97   | +/- 0.43     | S       | 3.18     | ---       |
| Cl K         | 521        | +/- 46           | 5.18     | +/- 0.46       | 4.38   | +/- 0.39     | Cl      | 5.18     | ---       |
| K K          | 383        | +/- 42           | 3.65     | +/- 0.40       | 2.80   | +/- 0.31     | K       | 3.65     | ---       |
| Ca K         | 2691       | +/- 109          | 27.39    | +/- 1.11       | 20.49  | +/- 0.83     | Ca      | 27.39    | ---       |
| Total        |            |                  | 100.00   |                | 100.00 |              |         | 100.00   | 0.000     |

## BK 16

Full scale counts: 8444

D68-02(2)

Cursor: 8.082 keV  
6 Counts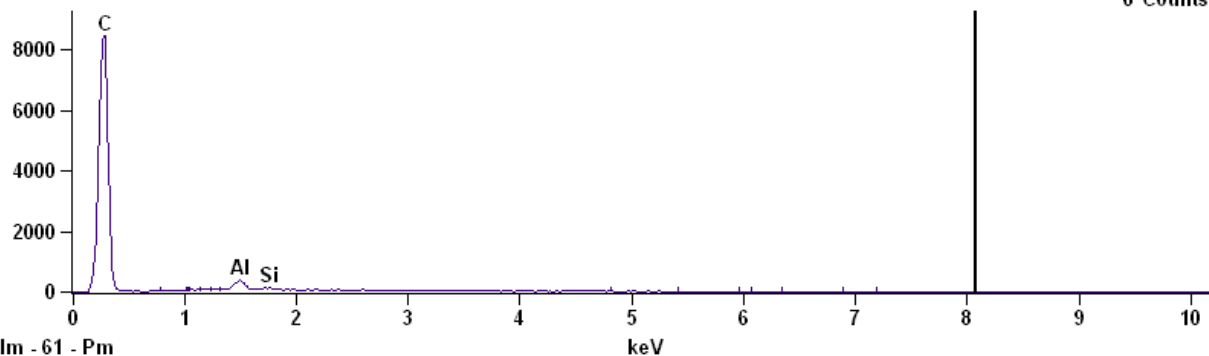

Live Time: 100.0 sec.

Fri Jan 24 12:40:39 2020

Filter Fit Chi Squared:65.140

Errors: +/- 1 Sigma

Correction Method: Proza (Phi-Rho-Z)

Acc.Voltage: 20.0 kV Take Off Angle: 29.8 deg.

Quantitative Results for: D68-02(2)

| Element Line | Net Counts | Net Counts Error | Weight % | Weight % Error | Atom % | Atom % Error | Formula | Compnd % | # Cations |
|--------------|------------|------------------|----------|----------------|--------|--------------|---------|----------|-----------|
| Al K         | 2967       | +/- 99           | 68.93    | +/- 2.30       | 69.78  | +/- 2.33     | Al      | 68.93    | ---       |
| Si K         | 515        | +/- 90           | 31.07    | +/- 5.43       | 30.22  | +/- 5.28     | Si      | 31.07    | ---       |
| Total        |            |                  | 100.00   |                | 100.00 |              |         | 100.00   | 0.000     |



## OR 1

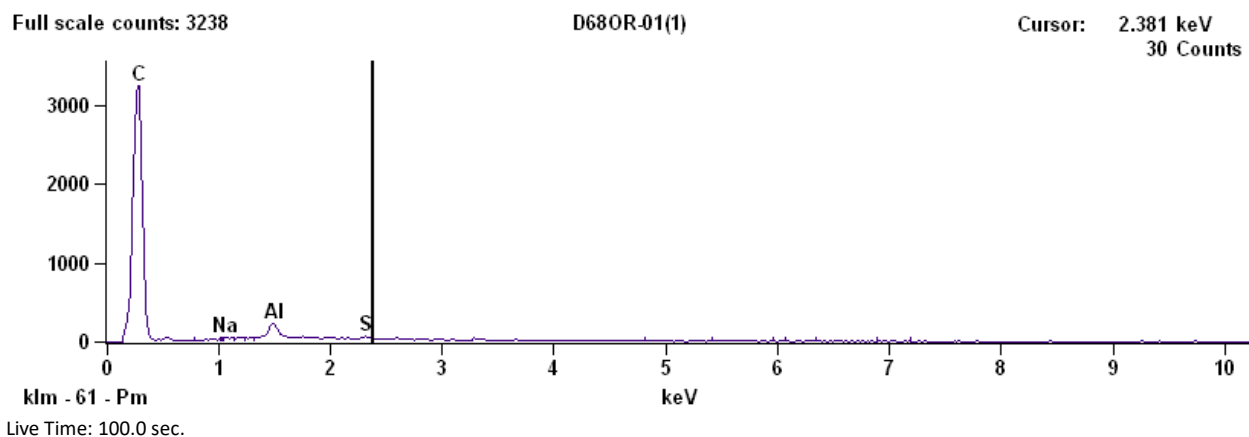

Fri Jan 24 12:51:26 2020

Filter Fit Chi Squared: 4.781

Errors: +/- 1 Sigma

Correction Method: Proza (Phi-Rho-Z)

Acc.Voltage: 20.0 kV Take Off Angle: 29.7 deg.

Quantitative Results for: D68OR-01(1)

| Element Line | Net Counts | Net Counts Error | Weight % | Weight % Error | Atom % | Atom % Error | Formula | Compnd % | # Cations |
|--------------|------------|------------------|----------|----------------|--------|--------------|---------|----------|-----------|
| Na K         | 86         | +/- 26           | 5.84     | +/- 1.77       | 6.98   | +/- 2.11     | Na      | 5.84     | ---       |
| Al K         | 1672       | +/- 69           | 76.50    | +/- 3.16       | 77.89  | +/- 3.21     | Al      | 76.50    | ---       |
| S K          | 216        | +/- 39           | 17.66    | +/- 3.19       | 15.13  | +/- 2.73     | S       | 17.66    | ---       |
| Total        |            |                  | 100.00   |                | 100.00 |              |         | 100.00   | 0.000     |

## OR 2

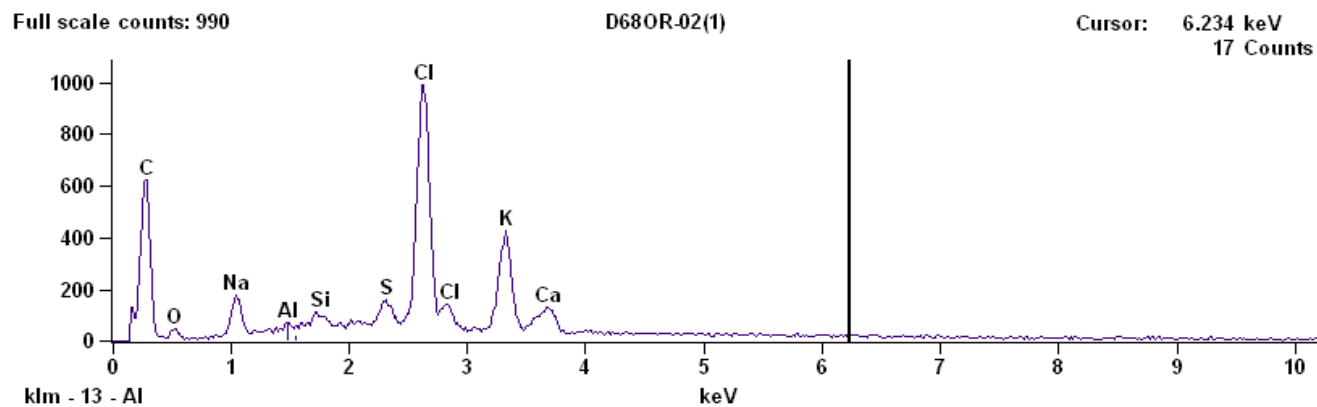

Live Time: 100.0 sec.

Fri Jan 24 13:02:27 2020

Filter Fit Chi Squared:3.577

Errors: +/- 1 Sigma

Correction Method: Proza (Phi-Rho-Z)

Acc.Voltage: 20.0 kV Take Off Angle: 29.7 deg.

Quantitative Results for: D68OR-02(1)

| Element Line | Net Counts | Net Counts Error | Weight % | Weight % Error | Atom % | Atom % Error | Formula | Compnd % | # Cations |
|--------------|------------|------------------|----------|----------------|--------|--------------|---------|----------|-----------|
| O K          | 200        | +/- 18           | 16.74    | +/- 1.51       | 29.88  | +/- 2.69     | O       | 16.74    | ---       |
| Na K         | 1289       | +/- 47           | 10.18    | +/- 0.37       | 12.65  | +/- 0.46     | Na      | 10.18    | 10.155    |
| Al K         | 148        | +/- 34           | 0.59     | +/- 0.14       | 0.63   | +/- 0.14     | Al      | 0.59     | 0.502     |
| Si K         | 554        | +/- 68           | 1.81     | +/- 0.22       | 1.84   | +/- 0.23     | Si      | 1.81     | 1.478     |
| S K          | 1111       | +/- 63           | 3.24     | +/- 0.18       | 2.89   | +/- 0.16     | S       | 3.24     | 2.322     |
| Cl K         | 11380      | +/- 180          | 39.34    | +/- 0.62       | 31.70  | +/- 0.50     | Cl      | 39.34    | 25.455    |
| K K          | 4674       | +/- 139          | 21.77    | +/- 0.65       | 15.91  | +/- 0.47     | K       | 21.77    | 12.776    |
| Ca K         | 1192       | +/- 109          | 6.33     | +/- 0.58       | 4.51   | +/- 0.41     | Ca      | 6.33     | 3.621     |
| Total        |            |                  | 100.00   |                | 100.00 |              |         | 100.00   | 56.308    |

## OR 3

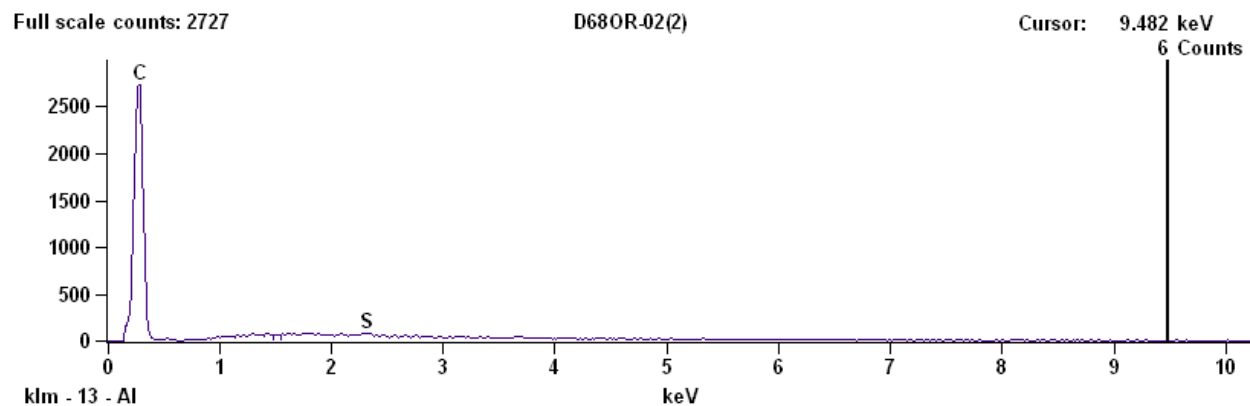

Live Time: 100.0 sec.

Fri Jan 24 13:04:32 2020

Filter Fit Chi Squared:4.690

Errors: +/- 1 Sigma

Correction Method: Proza (Phi-Rho-Z)

Acc.Voltage: 20.0 kV Take Off Angle: 29.7 deg.

Quantitative Results for: D68OR-02(2)

| Element Line | Net Counts | Net Counts Error | Weight % | Weight % Error | Atom % | Atom % Error | Formula | Compnd % | # Cations |
|--------------|------------|------------------|----------|----------------|--------|--------------|---------|----------|-----------|
| S K          | 295        | +/- 47           | 100.00   | +/-15.93       | 100.00 | +/-15.93     | S       | 100.00   | ---       |
| Total        |            |                  | 100.00   |                | 100.00 |              |         | 100.00   | 0.000     |

## OR 4

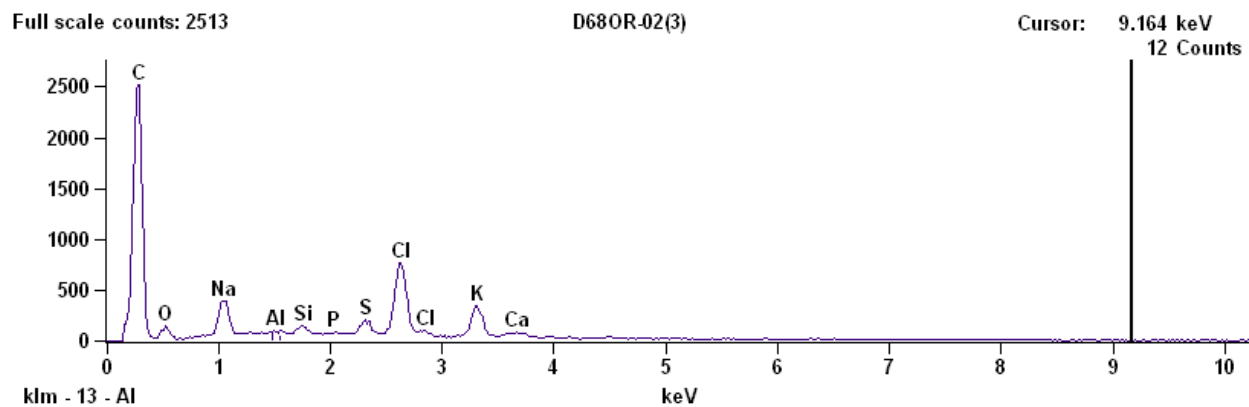

Live Time: 100.0 sec.

Fri Jan 24 13:06:39 2020

Filter Fit Chi Squared:3.934

Errors: +/- 1 Sigma

Correction Method: Proza (Phi-Rho-Z)

Acc.Voltage: 20.0 kV Take Off Angle: 29.7 deg.

Quantitative Results for: D68OR-02(3)

| Element Line | Net Counts | Net Counts Error | Weight % | Weight % Error | Atom % | Atom % Error | Formula | Compnd % | # Cations |
|--------------|------------|------------------|----------|----------------|--------|--------------|---------|----------|-----------|
| O K          | 771        | +/- 50           | 33.28    | +/- 2.16       | 48.85  | +/- 3.17     | O       | 33.28    | ---       |
| Na K         | 3223       | +/- 76           | 19.72    | +/- 0.47       | 20.15  | +/- 0.48     | Na      | 19.72    | 9.899     |
| Al K         | 205        | +/- 43           | 0.73     | +/- 0.15       | 0.64   | +/- 0.13     | Al      | 0.73     | 0.314     |
| Si K         | 794        | +/- 78           | 2.27     | +/- 0.22       | 1.90   | +/- 0.19     | Si      | 2.27     | 0.931     |
| P K          | 154        | +/- 51           | 0.44     | +/- 0.15       | 0.33   | +/- 0.11     | P       | 0.44     | 0.163     |
| S K          | 1431       | +/- 68           | 3.57     | +/- 0.17       | 2.62   | +/- 0.12     | S       | 3.57     | 1.286     |
| Cl K         | 8560       | +/- 165          | 24.63    | +/- 0.47       | 16.32  | +/- 0.31     | Cl      | 24.63    | 8.015     |
| K K          | 3764       | +/- 122          | 13.09    | +/- 0.42       | 7.86   | +/- 0.25     | K       | 13.09    | 3.863     |
| Ca K         | 592        | +/- 49           | 2.27     | +/- 0.19       | 1.33   | +/- 0.11     | Ca      | 2.27     | 0.653     |
| Total        |            |                  | 100.00   |                | 100.00 |              |         | 100.00   | 25.126    |

## OR 5

Full scale counts: 2286

D68OR-03(1)

Cursor: 9.720 keV  
5 Counts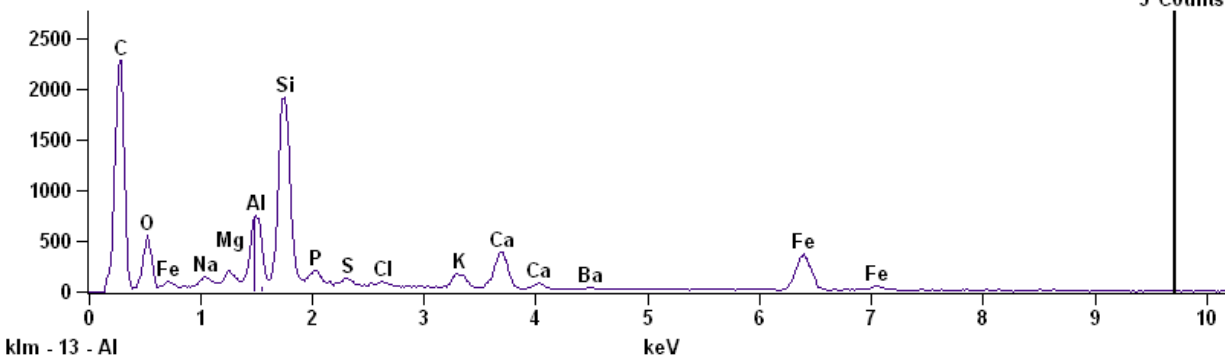

Live Time: 100.0 sec.

Fri Jan 24 13:11:27 2020

Filter Fit Chi Squared:2.279

Errors: +/- 1 Sigma

Correction Method: Proza (Phi-Rho-Z)

Acc.Voltage: 20.0 kV Take Off Angle: 29.7 deg.

Quantitative Results for: D68OR-03(1)

| Element Line | Net Counts | Net Counts Error | Weight % | Weight % Error | Atom % | Atom % Error | Formula | Compnd % | # Cations |
|--------------|------------|------------------|----------|----------------|--------|--------------|---------|----------|-----------|
| O K          | 3550       | +/- 93           | 36.61    | +/- 0.96       | 54.81  | +/- 1.44     | O       | 36.61    | ---       |
| Na K         | 744        | +/- 69           | 2.17     | +/- 0.20       | 2.27   | +/- 0.21     | Na      | 2.17     | 0.992     |
| Mg K         | 935        | +/- 61           | 1.65     | +/- 0.11       | 1.63   | +/- 0.11     | Mg      | 1.65     | 0.714     |
| Al K         | 6778       | +/- 151          | 8.49     | +/- 0.19       | 7.54   | +/- 0.17     | Al      | 8.49     | 3.302     |
| Si K         | 19826      | +/- 221          | 22.56    | +/- 0.25       | 19.24  | +/- 0.21     | Si      | 22.56    | 8.425     |
| P K          | 1334       | +/- 71           | 1.91     | +/- 0.10       | 1.48   | +/- 0.08     | P       | 1.91     | 0.648     |
| S K          | 793        | +/- 60           | 0.95     | +/- 0.07       | 0.71   | +/- 0.05     | S       | 0.95     | 0.311     |
| Cl K         | 425        | +/- 51           | 0.53     | +/- 0.06       | 0.36   | +/- 0.04     | Cl      | 0.53     | 0.156     |
| K K          | 1902       | +/- 121          | 2.25     | +/- 0.14       | 1.38   | +/- 0.09     | K       | 2.25     | 0.605     |
| Ca K         | 4878       | +/- 143          | 6.05     | +/- 0.18       | 3.62   | +/- 0.11     | Ca      | 6.05     | 1.583     |
| Fe K         | 6068       | +/- 157          | 15.87    | +/- 0.41       | 6.81   | +/- 0.18     | Fe      | 15.87    | 2.981     |
| Ba L         | 370        | +/- 65           | 0.93     | +/- 0.16       | 0.16   | +/- 0.03     | Ba      | 0.93     | 0.071     |
| Total        |            |                  | 100.00   |                | 100.00 |              |         | 100.00   | 19.787    |

## OR 6

Full scale counts: 3610

D68OR-04(1)

Cursor: 7.100 keV  
6 Counts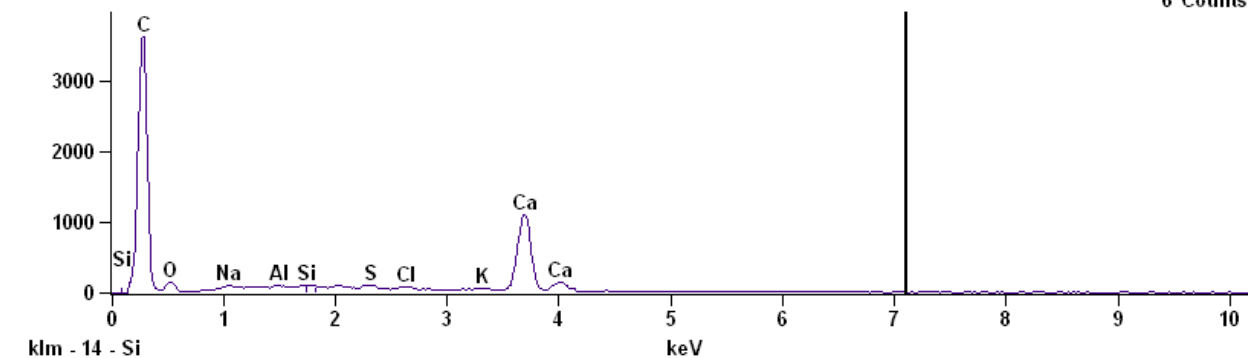

Live Time: 100.0 sec.

Fri Jan 24 13:16:39 2020

Filter Fit Chi Squared:3.681

Errors: +/- 1 Sigma

Correction Method: Proza (Phi-Rho-Z)

Acc.Voltage: 20.0 kV Take Off Angle: 29.7 deg.

Quantitative Results for: D68OR-04(1)

| Element Line | Net Counts | Net Counts Error | Weight % | Weight % Error | Atom % | Atom % Error | Formula | Compnd % | # Cations |
|--------------|------------|------------------|----------|----------------|--------|--------------|---------|----------|-----------|
| O K          | 849        | +/- 53           | 47.30    | +/- 2.95       | 68.01  | +/- 4.25     | O       | 47.30    | ---       |
| Na K         | 268        | +/- 53           | 2.19     | +/- 0.43       | 2.19   | +/- 0.43     | Na      | 2.19     | 0.773     |
| Al K         | 203        | +/- 42           | 0.66     | +/- 0.14       | 0.56   | +/- 0.12     | Al      | 0.66     | 0.199     |
| Si K         | 464        | +/- 76           | 1.21     | +/- 0.20       | 0.99   | +/- 0.16     | Si      | 1.21     | 0.350     |
| S K          | 707        | +/- 54           | 1.61     | +/- 0.12       | 1.15   | +/- 0.09     | S       | 1.61     | 0.407     |
| Cl K         | 481        | +/- 46           | 1.21     | +/- 0.12       | 0.78   | +/- 0.08     | Cl      | 1.21     | 0.277     |
| K K          | 296        | +/- 43           | 0.75     | +/- 0.11       | 0.44   | +/- 0.06     | K       | 0.75     | 0.155     |
| Ca K         | 15329      | +/- 199          | 45.08    | +/- 0.59       | 25.87  | +/- 0.34     | Ca      | 45.08    | 9.130     |
| Total        |            |                  | 100.00   |                | 100.00 |              |         | 100.00   | 11.290    |

## OR 7

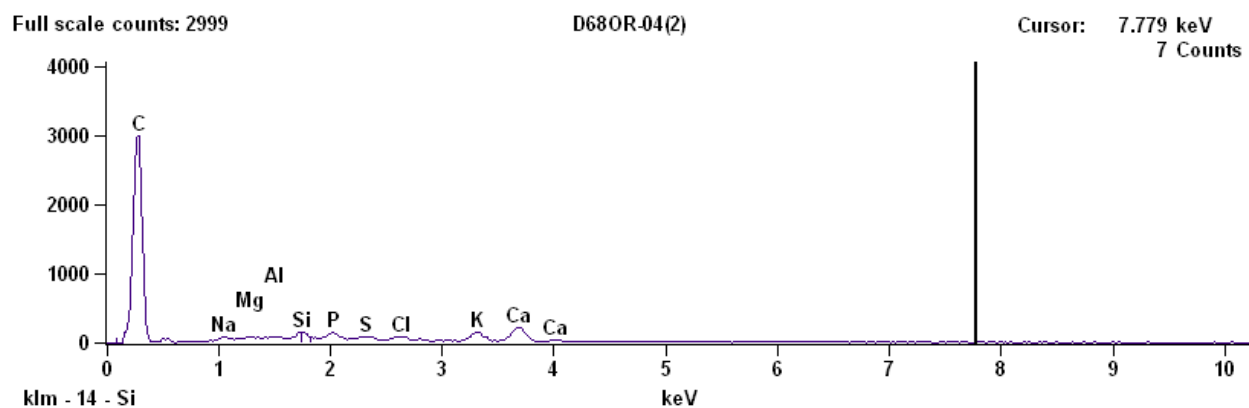

Live Time: 100.0 sec.

Fri Jan 24 13:18:54 2020

Filter Fit Chi Squared:5.001

Errors: +/- 1 Sigma

Correction Method: Proza (Phi-Rho-Z)

Acc.Voltage: 20.0 kV Take Off Angle: 29.7 deg.

Quantitative Results for: D68OR-04(2)

| Element Line | Net Counts | Net Counts Error | Weight % | Weight % Error | Atom % | Atom % Error | Formula | Compnd % | # Cations |
|--------------|------------|------------------|----------|----------------|--------|--------------|---------|----------|-----------|
| Na K         | 291        | +/- 50           | 6.48     | +/- 1.11       | 9.63   | +/- 1.65     | Na      | 6.48     | ---       |
| Mg K         | 162        | +/- 39           | 2.46     | +/- 0.59       | 3.45   | +/- 0.83     | Mg      | 2.46     | ---       |
| Al K         | 169        | +/- 41           | 1.89     | +/- 0.46       | 2.39   | +/- 0.58     | Al      | 1.89     | ---       |
| Si K         | 1091       | +/- 79           | 10.22    | +/- 0.74       | 12.42  | +/- 0.90     | Si      | 10.22    | ---       |
| P K          | 952        | +/- 56           | 10.15    | +/- 0.60       | 11.19  | +/- 0.66     | P       | 10.15    | ---       |
| S K          | 546        | +/- 52           | 5.63     | +/- 0.54       | 5.99   | +/- 0.57     | S       | 5.63     | ---       |
| Cl K         | 574        | +/- 47           | 6.56     | +/- 0.54       | 6.32   | +/- 0.52     | Cl      | 6.56     | ---       |
| K K          | 1632       | +/- 106          | 18.79    | +/- 1.22       | 16.41  | +/- 1.07     | K       | 18.79    | ---       |
| Ca K         | 2779       | +/- 116          | 37.81    | +/- 1.58       | 32.20  | +/- 1.34     | Ca      | 37.81    | ---       |
| Total        |            |                  | 100.00   |                | 100.00 |              |         | 100.00   | 0.000     |

## BLUE 1

Full scale counts: 1939

D68BLUE-01(1)

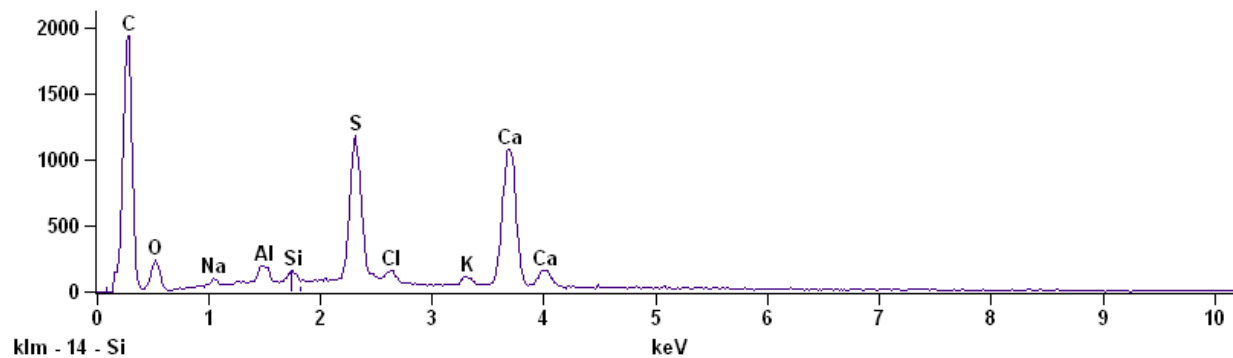

Live Time: 100.0 sec.

Fri Jan 24 13:33:37 2020

Filter Fit Chi Squared:3.592

Errors: +/- 1 Sigma

Correction Method: Proza (Phi-Rho-Z)

Acc.Voltage: 20.0 kV Take Off Angle: 29.6 deg.

Quantitative Results for: D68BLUE-01(1)

| Element Line | Net Counts | Net Counts Error | Weight % | Weight % Error | Atom % | Atom % Error | Formula | Compnd % | # Cations |
|--------------|------------|------------------|----------|----------------|--------|--------------|---------|----------|-----------|
| O K          | 1633       | +/- 57           | 46.19    | +/- 1.61       | 65.38  | +/- 2.28     | O       | 46.19    | ---       |
| Na K         | 384        | +/- 33           | 1.66     | +/- 0.14       | 1.64   | +/- 0.14     | Na      | 1.66     | 0.601     |
| Al K         | 1098       | +/- 50           | 1.95     | +/- 0.09       | 1.63   | +/- 0.07     | Al      | 1.95     | 0.600     |
| Si K         | 649        | +/- 51           | 0.96     | +/- 0.08       | 0.77   | +/- 0.06     | Si      | 0.96     | 0.283     |
| S K          | 13821      | +/- 193          | 18.24    | +/- 0.25       | 12.89  | +/- 0.18     | S       | 18.24    | 4.731     |
| Cl K         | 1205       | +/- 125          | 2.11     | +/- 0.22       | 1.35   | +/- 0.14     | Cl      | 2.11     | 0.494     |
| K K          | 728        | +/- 53           | 1.25     | +/- 0.09       | 0.72   | +/- 0.05     | K       | 1.25     | 0.265     |
| Ca K         | 14863      | +/- 203          | 27.65    | +/- 0.38       | 15.62  | +/- 0.21     | Ca      | 27.65    | 5.735     |
| Total        |            |                  | 100.00   |                | 100.00 |              |         | 100.00   | 12.709    |



## BLUE 2

Full scale counts: 2409

D68BLUE-05(1)

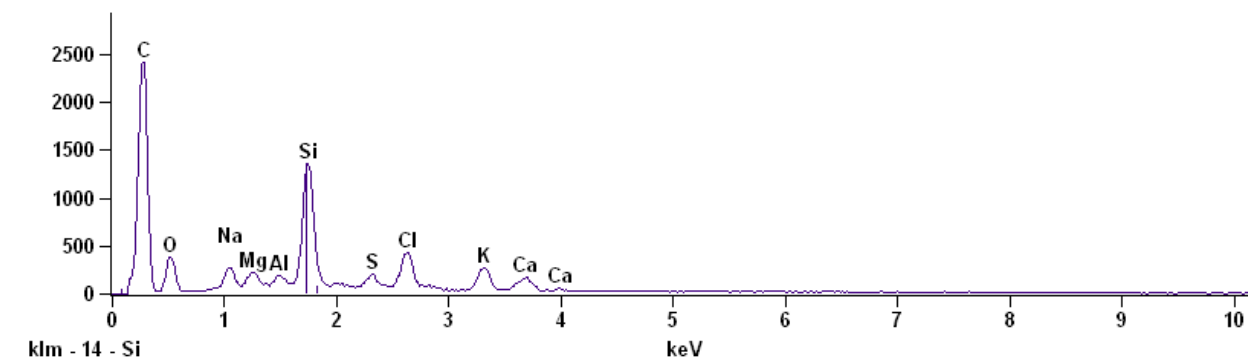

Live Time: 100.0 sec.

Fri Jan 24 13:43:07 2020

Filter Fit Chi Squared:4.034

Errors: +/- 1 Sigma

Correction Method: Proza (Phi-Rho-Z)

Acc.Voltage: 20.0 kV Take Off Angle: 29.6 deg.

Quantitative Results for: D68BLUE-05(1)

| Element Line | Net Counts | Net Counts Error | Weight % | Weight % Error | Atom % | Atom % Error | Formula | Compnd % | # Cations |
|--------------|------------|------------------|----------|----------------|--------|--------------|---------|----------|-----------|
| O K          | 2775       | +/- 72           | 47.60    | +/- 1.23       | 62.53  | +/- 1.62     | O       | 47.60    | ---       |
| Na K         | 1985       | +/- 76           | 7.14     | +/- 0.27       | 6.53   | +/- 0.25     | Na      | 7.14     | 2.507     |
| Mg K         | 1468       | +/- 89           | 3.63     | +/- 0.22       | 3.14   | +/- 0.19     | Mg      | 3.63     | 1.205     |
| Al K         | 841        | +/- 62           | 1.55     | +/- 0.11       | 1.21   | +/- 0.09     | Al      | 1.55     | 0.463     |
| Si K         | 13365      | +/- 156          | 20.40    | +/- 0.24       | 15.27  | +/- 0.18     | Si      | 20.40    | 5.861     |
| S K          | 1615       | +/- 119          | 2.67     | +/- 0.20       | 1.75   | +/- 0.13     | S       | 2.67     | 0.673     |
| Cl K         | 4717       | +/- 140          | 8.49     | +/- 0.25       | 5.03   | +/- 0.15     | Cl      | 8.49     | 1.932     |
| K K          | 2796       | +/- 125          | 5.24     | +/- 0.23       | 2.82   | +/- 0.13     | K       | 5.24     | 1.081     |
| Ca K         | 1640       | +/- 116          | 3.27     | +/- 0.23       | 1.71   | +/- 0.12     | Ca      | 3.27     | 0.658     |
| Total        |            |                  | 100.00   |                | 100.00 |              |         | 100.00   | 14.380    |

## BLUE 3

Full scale counts: 2612

D68BLUE-05(2)

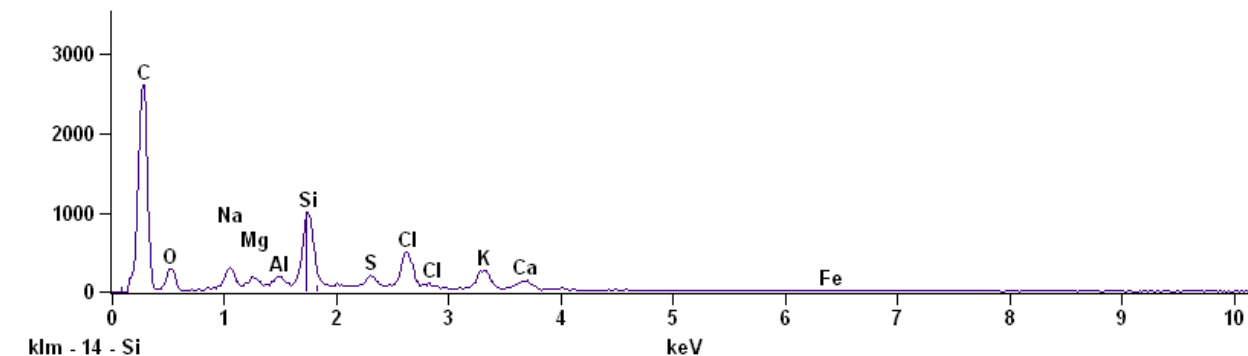

Live Time: 100.0 sec.

Fri Jan 24 13:45:20 2020

Filter Fit Chi Squared:3.136

Errors: +/- 1 Sigma

Correction Method: Proza (Phi-Rho-Z)

Acc.Voltage: 20.0 kV Take Off Angle: 29.6 deg.

Quantitative Results for: D68BLUE-05(2)

| Element Line | Net Counts | Net Counts Error | Weight % | Weight % Error | Atom % | Atom % Error | Formula | Compnd % | # Cations |
|--------------|------------|------------------|----------|----------------|--------|--------------|---------|----------|-----------|
| O K          | 2073       | +/- 65           | 43.81    | +/- 1.37       | 59.33  | +/- 1.86     | O       | 43.81    | ---       |
| Na K         | 2348       | +/- 75           | 9.74     | +/- 0.31       | 9.18   | +/- 0.29     | Na      | 9.74     | 3.712     |
| Mg K         | 811        | +/- 56           | 2.42     | +/- 0.17       | 2.16   | +/- 0.15     | Mg      | 2.42     | 0.873     |
| Al K         | 869        | +/- 57           | 1.87     | +/- 0.12       | 1.50   | +/- 0.10     | Al      | 1.87     | 0.607     |
| Si K         | 9646       | +/- 138          | 17.18    | +/- 0.25       | 13.25  | +/- 0.19     | Si      | 17.18    | 5.361     |
| S K          | 1546       | +/- 68           | 2.86     | +/- 0.13       | 1.93   | +/- 0.09     | S       | 2.86     | 0.782     |
| Cl K         | 5396       | +/- 145          | 10.93    | +/- 0.29       | 6.68   | +/- 0.18     | Cl      | 10.93    | 2.702     |
| K K          | 3157       | +/- 127          | 6.81     | +/- 0.27       | 3.77   | +/- 0.15     | K       | 6.81     | 1.526     |
| Ca K         | 1391       | +/- 112          | 3.21     | +/- 0.26       | 1.74   | +/- 0.14     | Ca      | 3.21     | 0.702     |
| Fe K         | 251        | +/- 40           | 1.17     | +/- 0.19       | 0.46   | +/- 0.07     | Fe      | 1.17     | 0.184     |
| Total        |            |                  | 100.00   |                | 100.00 |              |         | 100.00   | 16.449    |

## BLUE 4

Full scale counts: 628

D68BLUE-06(1)

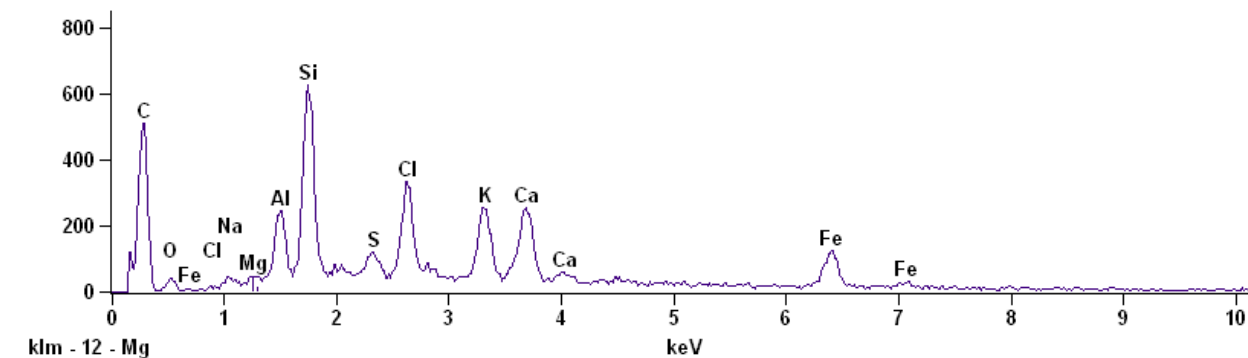

Live Time: 100.0 sec.

Fri Jan 24 13:51:05 2020

Filter Fit Chi Squared:3.035

Errors: +/- 1 Sigma

Correction Method: Proza (Phi-Rho-Z)

Acc.Voltage: 20.0 kV Take Off Angle: 29.3 deg.

Quantitative Results for: D68BLUE-06(1)

| Element Line | Net Counts | Net Counts Error | Weight % | Weight % Error | Atom % | Atom % Error | Formula | Compnd % | # Cations |
|--------------|------------|------------------|----------|----------------|--------|--------------|---------|----------|-----------|
| O K          | 225        | +/- 25           | 14.58    | +/- 1.62       | 26.99  | +/- 3.00     | O       | 14.58    | ---       |
| Na K         | 174        | +/- 21           | 1.52     | +/- 0.18       | 1.96   | +/- 0.24     | Na      | 1.52     | 1.740     |
| Mg K         | 137        | +/- 33           | 0.72     | +/- 0.17       | 0.88   | +/- 0.21     | Mg      | 0.72     | 0.780     |
| Al K         | 2063       | +/- 85           | 7.67     | +/- 0.32       | 8.42   | +/- 0.35     | Al      | 7.67     | 7.488     |
| Si K         | 6061       | +/- 121          | 20.63    | +/- 0.41       | 21.76  | +/- 0.43     | Si      | 20.63    | 19.349    |
| S K          | 1006       | +/- 99           | 3.57     | +/- 0.35       | 3.30   | +/- 0.32     | S       | 3.57     | 2.930     |
| Cl K         | 3322       | +/- 121          | 12.77    | +/- 0.47       | 10.67  | +/- 0.39     | Cl      | 12.77    | 9.490     |
| K K          | 2883       | +/- 125          | 11.59    | +/- 0.50       | 8.78   | +/- 0.38     | K       | 11.59    | 7.807     |
| Ca K         | 3192       | +/- 128          | 14.10    | +/- 0.57       | 10.42  | +/- 0.42     | Ca      | 14.10    | 9.265     |
| Fe K         | 1481       | +/- 107          | 12.87    | +/- 0.93       | 6.83   | +/- 0.49     | Fe      | 12.87    | 6.070     |
| Total        |            |                  | 100.00   |                | 100.00 |              |         | 100.00   | 64.919    |

## BLUE 5

Full scale counts: 3863

D68BLUE-07(2)

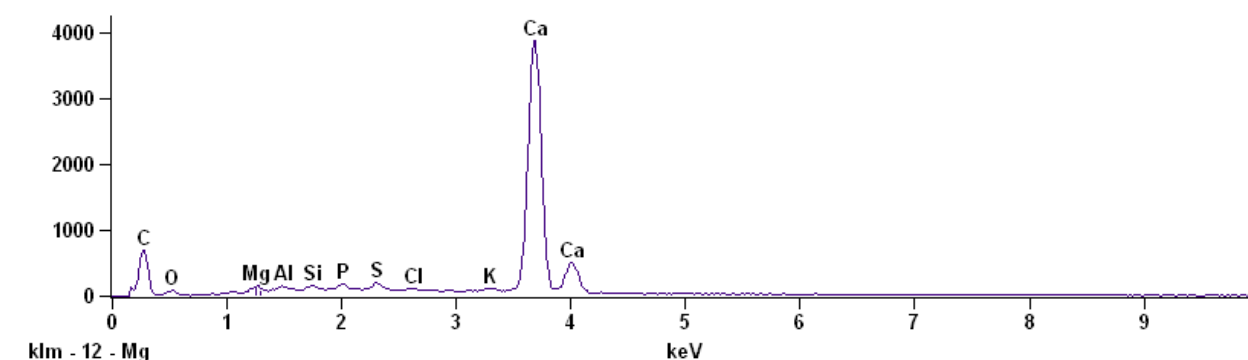

Live Time: 100.0 sec.

Fri Jan 24 13:58:32 2020

Filter Fit Chi Squared:5.013

Errors: +/- 1 Sigma

Correction Method: Proza (Phi-Rho-Z)

Acc.Voltage: 20.0 kV Take Off Angle: 29.8 deg.

Quantitative Results for: D68BLUE-07(2)

| Element Line | Net Counts | Net Counts Error | Weight % | Weight % Error | Atom % | Atom % Error | Formula | Compnd % | # Cations |
|--------------|------------|------------------|----------|----------------|--------|--------------|---------|----------|-----------|
| O K          | 440        | +/- 24           | 18.10    | +/- 0.99       | 34.82  | +/- 1.90     | O       | 18.10    | ---       |
| Mg K         | 713        | +/- 44           | 1.57     | +/- 0.10       | 1.98   | +/- 0.12     | Mg      | 1.57     | 1.368     |
| Al K         | 887        | +/- 90           | 1.37     | +/- 0.14       | 1.56   | +/- 0.16     | Al      | 1.37     | 1.078     |
| Si K         | 802        | +/- 56           | 1.01     | +/- 0.07       | 1.10   | +/- 0.08     | Si      | 1.01     | 0.760     |
| P K          | 1026       | +/- 65           | 1.27     | +/- 0.08       | 1.26   | +/- 0.08     | P       | 1.27     | 0.871     |
| S K          | 1559       | +/- 123          | 1.72     | +/- 0.14       | 1.65   | +/- 0.13     | S       | 1.72     | 1.138     |
| Cl K         | 368        | +/- 57           | 0.44     | +/- 0.07       | 0.39   | +/- 0.06     | Cl      | 0.44     | 0.266     |
| K K          | 362        | +/- 58           | 0.42     | +/- 0.07       | 0.33   | +/- 0.05     | K       | 0.42     | 0.228     |
| Ca K         | 52317      | +/- 376          | 74.10    | +/- 0.53       | 56.90  | +/- 0.41     | Ca      | 74.10    | 39.219    |
| Total        |            |                  | 100.00   |                | 100.00 |              |         | 100.00   | 44.927    |

## BLUE 6

Full scale counts: 1448

D68BLUE-07(3)

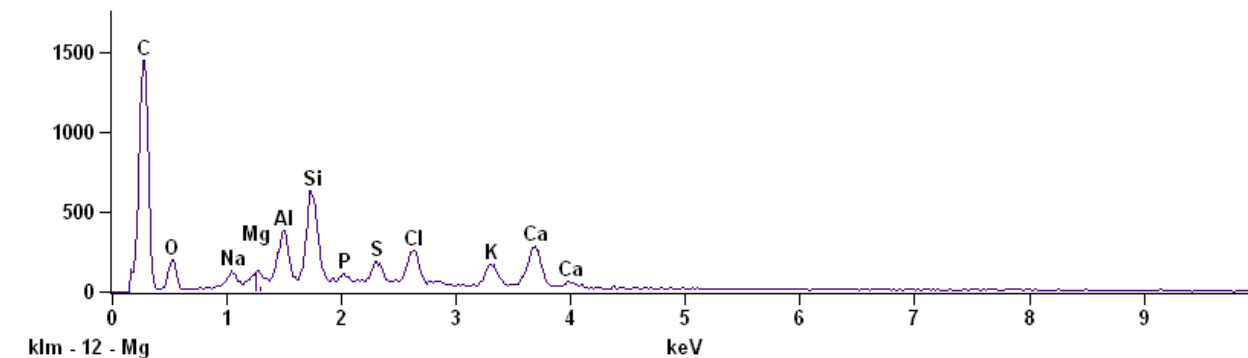

Live Time: 100.0 sec.

Fri Jan 24 14:00:44 2020

Filter Fit Chi Squared:3.956

Errors: +/- 1 Sigma

Correction Method: Proza (Phi-Rho-Z)

Acc.Voltage: 20.0 kV Take Off Angle: 29.8 deg.

Quantitative Results for: D68BLUE-07(3)

| Element Line | Net Counts | Net Counts Error | Weight % | Weight % Error | Atom % | Atom % Error | Formula | Compnd % | # Cations |
|--------------|------------|------------------|----------|----------------|--------|--------------|---------|----------|-----------|
| O K          | 1212       | +/- 50           | 42.51    | +/- 1.75       | 58.72  | +/- 2.42     | O       | 42.51    | ---       |
| Na K         | 671        | +/- 56           | 4.01     | +/- 0.33       | 3.86   | +/- 0.32     | Na      | 4.01     | 1.576     |
| Mg K         | 633        | +/- 77           | 2.44     | +/- 0.30       | 2.22   | +/- 0.27     | Mg      | 2.44     | 0.908     |
| Al K         | 2844       | +/- 114          | 8.10     | +/- 0.32       | 6.63   | +/- 0.27     | Al      | 8.10     | 2.712     |
| Si K         | 5731       | +/- 133          | 15.15    | +/- 0.35       | 11.92  | +/- 0.28     | Si      | 15.15    | 4.874     |
| P K          | 331        | +/- 55           | 1.04     | +/- 0.17       | 0.74   | +/- 0.12     | P       | 1.04     | 0.303     |
| S K          | 1445       | +/- 63           | 3.87     | +/- 0.17       | 2.67   | +/- 0.12     | S       | 3.87     | 1.092     |
| Cl K         | 2605       | +/- 117          | 7.69     | +/- 0.35       | 4.79   | +/- 0.22     | Cl      | 7.69     | 1.959     |
| K K          | 1652       | +/- 57           | 5.02     | +/- 0.17       | 2.84   | +/- 0.10     | K       | 5.02     | 1.159     |
| Ca K         | 3121       | +/- 122          | 10.16    | +/- 0.40       | 5.60   | +/- 0.22     | Ca      | 10.16    | 2.291     |
| Total        |            |                  | 100.00   |                | 100.00 |              |         | 100.00   | 16.873    |

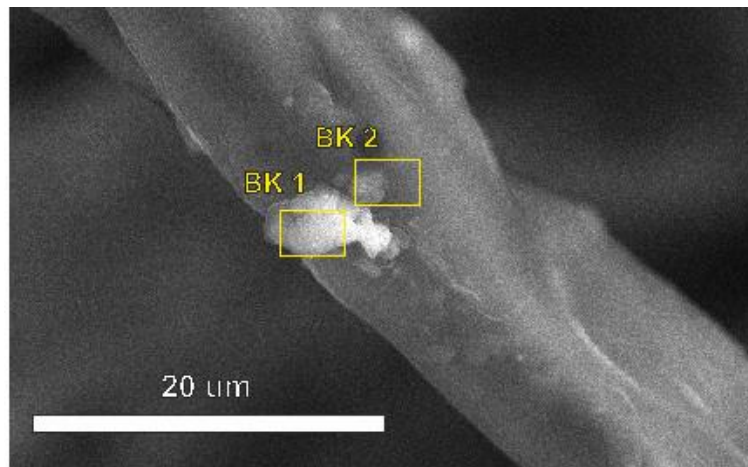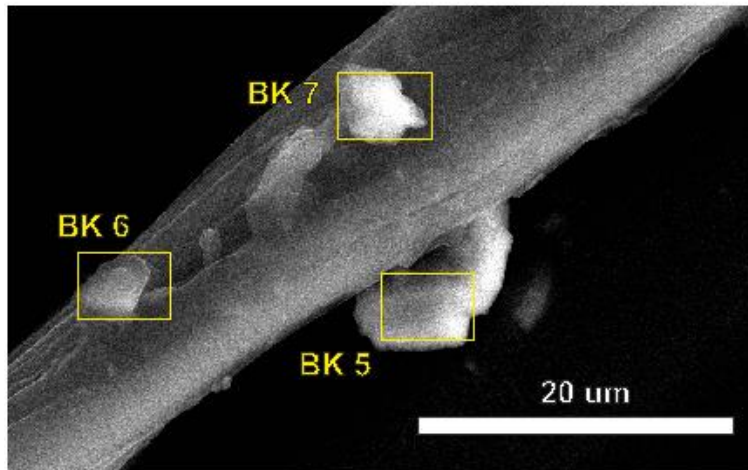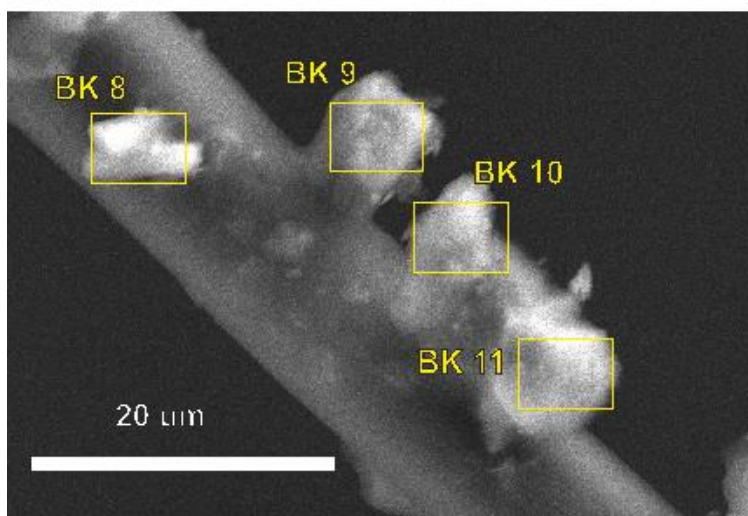

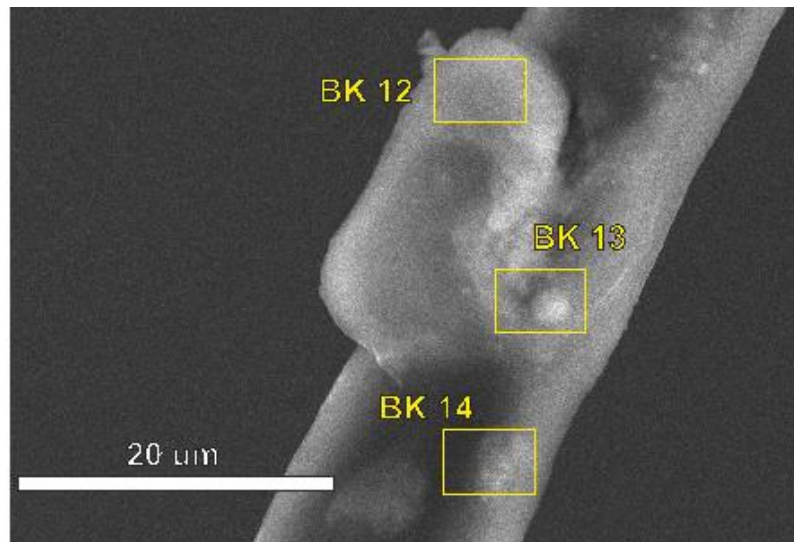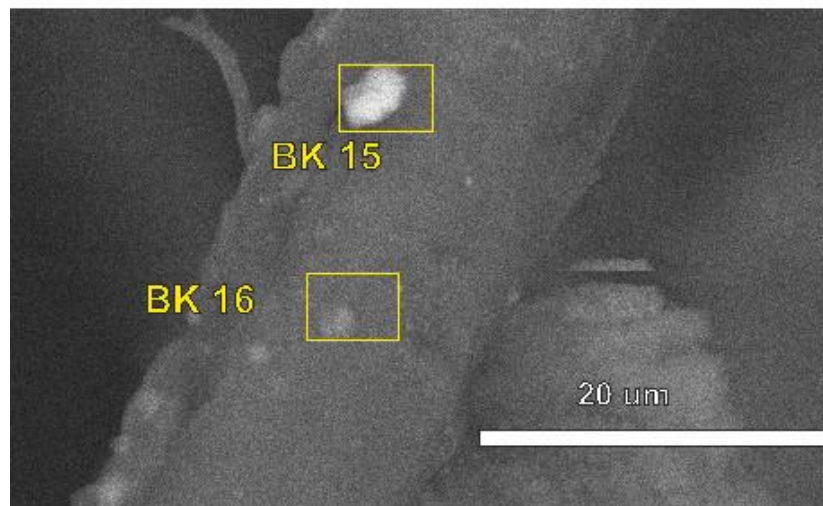



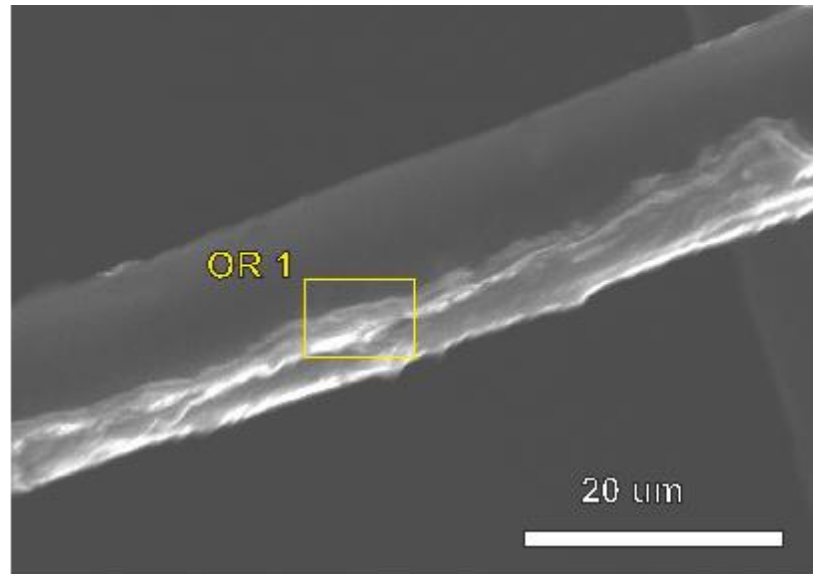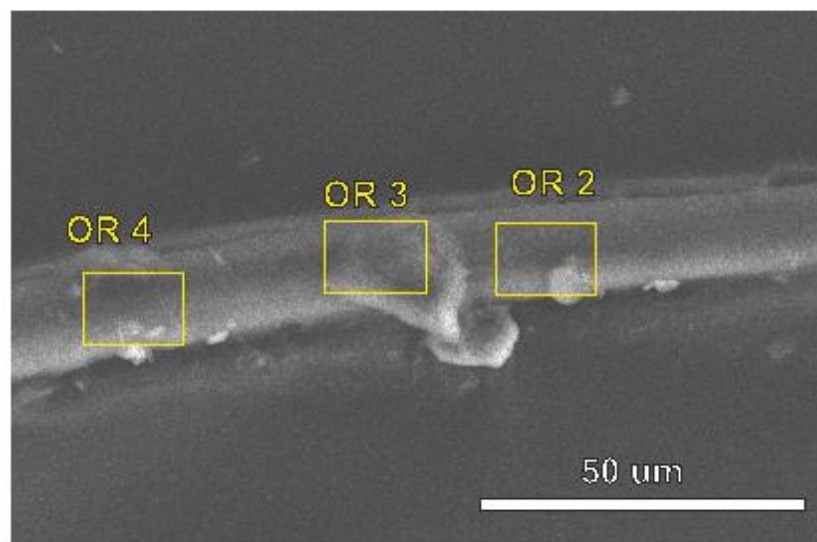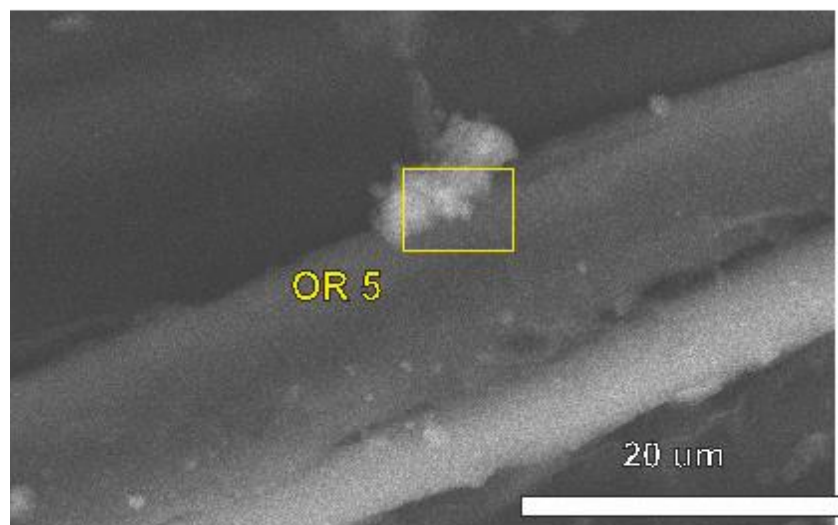

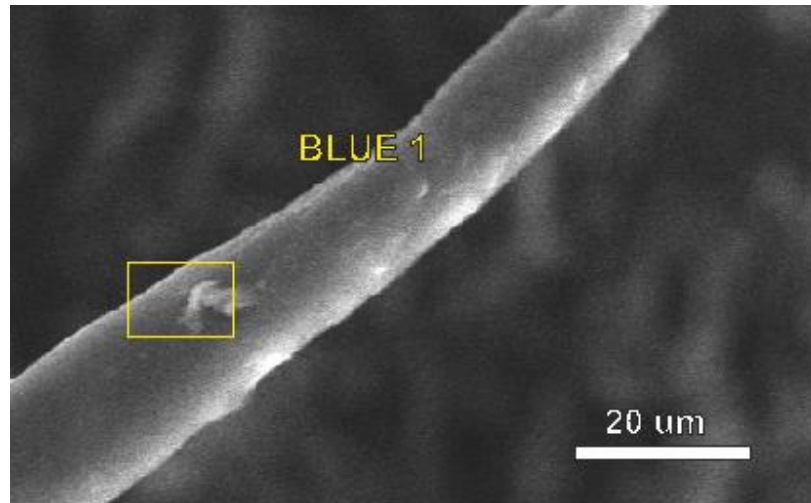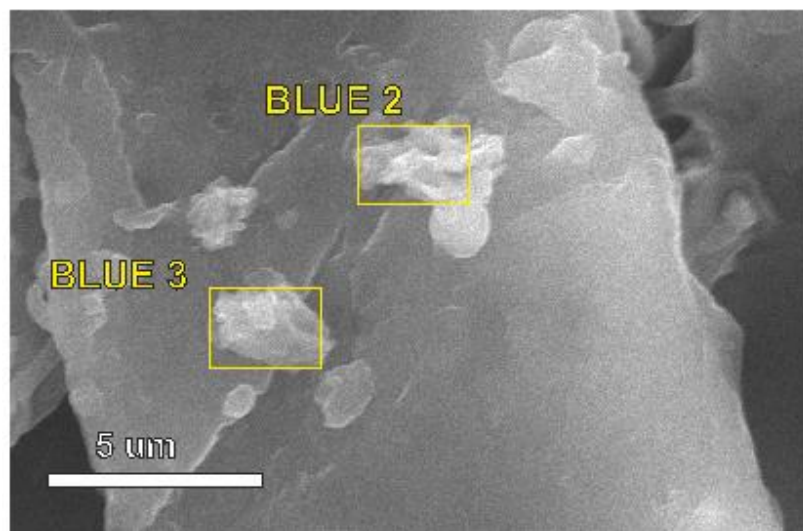

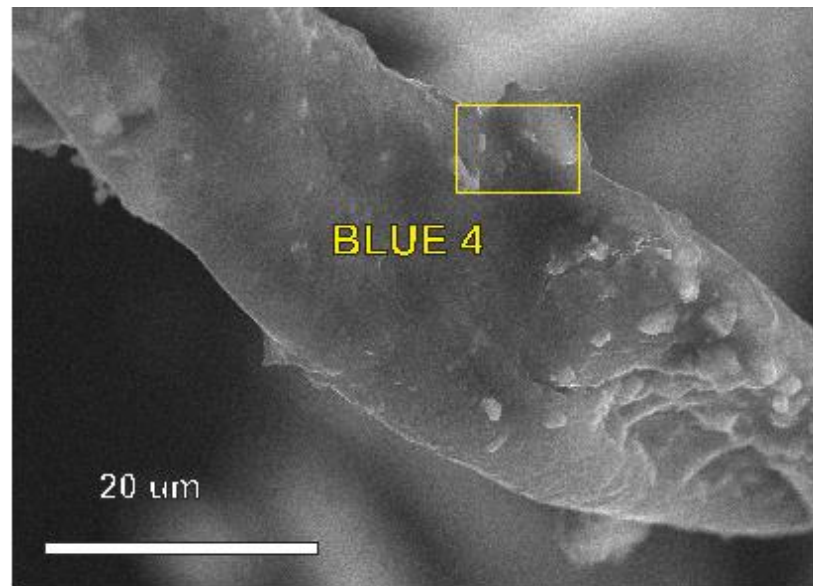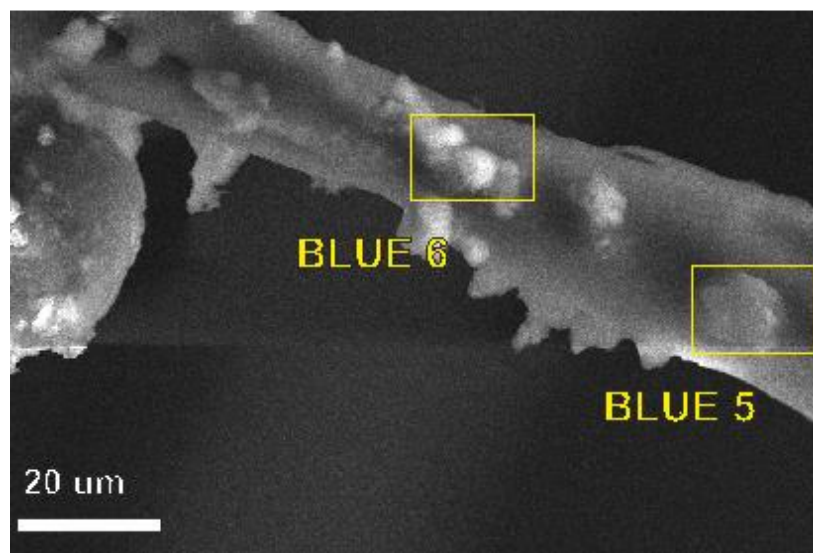

Supplement: s1 [file s1]
